# Supplementary material for: Association of adverse perinatal outcomes of intrahepatic cholestasis of pregnancy with biochemical markers: results of aggregate and individual patient data meta-analyses
Source: PubMed Central journal article supplement (PMC6396441; doi:10.1016/s0140-6736(18)31877-4), 2019-03-02
Supplement: mmc1.pdf [file mmc1.pdf]

# THE LANCET

## Supplementary appendix

This appendix formed part of the original submission and has been peer reviewed. We post it as supplied by the authors.

Supplement to: Ovadia C, Seed PT, Sklavounos A, et al. Association of adverse perinatal outcomes of intrahepatic cholestasis of pregnancy with biochemical markers: results of aggregate and individual patient data meta-analyses. *Lancet* 2019; published online Feb 14. [http://dx.doi.org/10.1016/S0140-6736\(18\)31877-4](http://dx.doi.org/10.1016/S0140-6736(18)31877-4).

## Appendix contents

|                                                                                                                                                                                             |    |
|---------------------------------------------------------------------------------------------------------------------------------------------------------------------------------------------|----|
| Table 1. Selection criteria used for identification of relevant literature                                                                                                                  | 2  |
| Table 2. Description of studies used for aggregate data meta-analysis                                                                                                                       | 3  |
| Table 3. Studies used for individual patient data analysis                                                                                                                                  | 7  |
| Table 4. Studies not included in individual patient data analysis for which data were Requested                                                                                             | 12 |
| Table 5. Demographic and pregnancy characteristics of women included in the systematic review and IPD analysis                                                                              | 13 |
| Table 6. Description of ICP disease                                                                                                                                                         | 14 |
| Table 7. Summary table of results – aggregate data case-control comparisons                                                                                                                 | 15 |
| Table 8. Summary of IPD associations between serum biochemistry and adverse perinatal outcomes for multifetal pregnancies                                                                   | 16 |
| Table 9. Sensitivity analysis of IPD associations between serum biochemistry and adverse perinatal outcomes for singleton pregnancies excluding unpublished studies                         | 17 |
| Table 10. National rates of stillbirth from 28 gestational weeks for studies included in the individual patient data analysis                                                               | 18 |
| Figure 1. Forest plots of selected perinatal outcomes from aggregated patient data                                                                                                          | 19 |
| Figure 2. Correction for publication bias in meta-analysis of neonatal unit admission rates in intrahepatic cholestasis of pregnancy                                                        | 20 |
| Figure 3. Receiver operating curves for association between stillbirth and serum biochemical markers for multifetal pregnancies                                                             | 21 |
| Figure 4. Receiver operating characteristic curve for the association between total bile acid concentrations and stillbirth for women treated and untreated with ursodeoxycholic acid       | 22 |
| Figure 5. Proportion and incidence of stillbirths and total number of pregnancies by total bile acid concentrations in multifetal pregnancies with intrahepatic cholestasis of pregnancy    | 23 |
| Figure 6. Stillbirth rate by number of fetuses <i>in utero</i> for singleton pregnancies                                                                                                    | 24 |
| Figure 7. Sensitivity analysis of stillbirth rate by number of fetuses <i>in utero</i> for singleton pregnancies                                                                            | 25 |
| Figure 8. Spontaneous preterm birth rate by number of fetuses <i>in utero</i> for singleton pregnancies                                                                                     | 26 |
| Figure 9. Proportion and incidence of preterm births and total number of pregnancies by total bile acid concentrations in multifetal pregnancies with intrahepatic cholestasis of pregnancy | 27 |
| References                                                                                                                                                                                  | 28 |

**Table 1. Selection criteria used for identification of relevant literature**

|                                        |                                                                                                                                                                                                                                                                                                                                                                                                                                                                                                                                                                                                                                                                                                                                                                                                                                                                                                                                                                                                                                                                                                     |
|----------------------------------------|-----------------------------------------------------------------------------------------------------------------------------------------------------------------------------------------------------------------------------------------------------------------------------------------------------------------------------------------------------------------------------------------------------------------------------------------------------------------------------------------------------------------------------------------------------------------------------------------------------------------------------------------------------------------------------------------------------------------------------------------------------------------------------------------------------------------------------------------------------------------------------------------------------------------------------------------------------------------------------------------------------------------------------------------------------------------------------------------------------|
| ICP-related search terms               | “cholestasis, intrahepatic, of pregnancy”, “pregnancy-related cholestasis”, “pregnancy related cholestasis”, “recurrent intrahepatic cholestasis of pregnancy”, “obstetric cholestasis”, “cholestasis, intrahepatic of pregnancy”, “cholestasis, pregnancy-related”, “familial intrahepatic cholestasis of pregnancy”, “intrahepatic cholestasis of pregnancy”                                                                                                                                                                                                                                                                                                                                                                                                                                                                                                                                                                                                                                                                                                                                      |
| Perinatal outcome-related search terms | “pregnancy outcome”, “fetal outcome”, “fetal distress”, “obstetric labor complication*”, “pregnancy, high*risk”, “delivery, obstetric”, “labor, obstetric”, “live birth”, “obstetric labor, premature”, “premature birth”, “caesarean section”, “abortion, spontaneous”, “stillbirth”, “fetal death”, “infant mortality”, “maternal mortality”, “perinatal mortality”, “gestational age”, “infant, low birth weight”, “apgar score”, “pregnancy outcome*”, “pregnancy complication”, “obstetric outcome*”, “obstetric complication*”, “normal birth*”, “live birth*”, “premature birth*”, “preterm birth*”, “preterm deliver*”, “born preterm”, “cesarean*”, “c-section”, “caesarean*”, “miscarriage*”, “stillbirth*”, “intrauterine death*”, “neonatal death*”, “postpartum haemorrhage*”, “postpartum hemorrhage*”, “postpartum complication*”, “special care baby unit admission*”, “SCBU admission*”, “neonatal intensive care unit admission*”, “NICU admission*”, “neonatal unit*”, “NNU admission*”, “small for gestational age”, “SGA”, “intra-uterine growth restriction”, “IUGR”, “Apgar” |
| Inclusion criteria                     | Prospective case-control studies, prospective cohort studies, retrospective cohort studies, population based studies, and randomised controlled trials that reported bile acid concentrations and perinatal outcomes (at least one of stillbirth, preterm birth, neonatal unit admission, and meconium stained amniotic fluid)<br>Personal communications of unpublished cohorts were included in the IPD meta-analysis<br>ICP diagnosis based upon pruritus and elevated serum bile acid concentrations with or without raised liver transaminase concentrations<br>Ethical approval to share the data                                                                                                                                                                                                                                                                                                                                                                                                                                                                                             |
| Exclusion criteria                     | Case reports, studies not comprising cohorts, or successive cases seen in a unit, studies with high risk of bias from groups selected (e.g. where a sub-group of babies with poor outcomes were explicitly excluded)<br>Studies with 30 or fewer study participants<br>Diagnosis of ICP not using serum bile acid concentrations<br>Abstracts, Letters to the Editor without peer review<br>Studies that did not report serum bile acid concentrations or any perinatal outcomes                                                                                                                                                                                                                                                                                                                                                                                                                                                                                                                                                                                                                    |

ICP: intrahepatic cholestasis of pregnancy; IPD: individual patient data. Prospective studies were recruited throughout the study period, with results accumulated in real time, whilst retrospective studies were defined as those recruited following conclusion of the associated pregnancies. Case-control studies were those recruiting affected women with ICP and matched control (unaffected) women, whilst cohort studies recruited a population of women (national / regional / local) and observed their outcomes. Randomised controlled trials compared the use of an intervention between groups of affected women.

**Table 2. Description of studies used for aggregate data meta-analysis**

|                                       | N° of cases | N° of controls | Country      | Design                     | Multifetal pregnancies      | Definition of ICP used                                                                                                                                                                                                | Data quality (NOS) | Data collection period | Major predictors reported                                            | Outcome measures reported                                                                                                              |
|---------------------------------------|-------------|----------------|--------------|----------------------------|-----------------------------|-----------------------------------------------------------------------------------------------------------------------------------------------------------------------------------------------------------------------|--------------------|------------------------|----------------------------------------------------------------------|----------------------------------------------------------------------------------------------------------------------------------------|
| Al Shobaili et al (2011) <sup>1</sup> | 76          | 200            | Saudi Arabia | Prospective cohort         | 2.6% ICP<br>2.0% controls   | Pruritus onset in pregnancy, ↑TBA, no pre-gestational skin disease, no other cause of pruritus, gall bladder, or liver disease                                                                                        | 4                  | 2008-2010              | TBA, ALT, bilirubin, US doppler indices                              | Apgar score, GA delivery, IUFD, MOD, MSAF, NNU, NRHRM, PPH, PTB, RDS, UC arterial pH                                                   |
| Ataalla et al (2016) <sup>2</sup>     | 98          | 50             | Egypt        | Prospective case-control   | n/a                         | Pruritus without a rash (except excoriative), ↑TBA, no other liver disease, skin disease, allergic disorder, cholelithiasis, or hepatic viral infection                                                               | 4                  | 2011-2013              | Pruritus severity, TBA, ALT, AST, bilirubin, ALP, alb                | Apgar score, fetal distress, fetal echocardiogram, GA delivery, MSAF, neonatal bilirubin, neonatal TBA, RDS, sepsis                    |
| Castaño et al (2006) <sup>3</sup>     | 41          | 30             | Argentina    | Prospective case-control   | n/a                         | Pruritus, ↑TBA, and ↑ALT/AST after 20/40, no other autoimmune disease, moderate-severe alcohol intake, HIV infection, Hepatitis A, B, or C infection, skin disease, or biliary obstruction, post-partum normalisation | 4                  | 2004-2005              | Pruritus severity, TBA, individual BA, ALT, AST, bilirubin, GGT, ALP | Apgar score, BW, GA delivery, SGA                                                                                                      |
| Cui et al (2018) <sup>4</sup>         | 42          | 55             | China        | Prospective case-control   | 21.4% ICP<br>3.6% controls  | As per RCOG Guideline 2 <sup>nd</sup> edition: i.e. gestational pruritus, ↑TBA and/or ↑ALT/AST, postpartum resolution, no other cause of itching or liver dysfunction <sup>5</sup>                                    | 5                  | 2012-2015              | TBA, individual BA, ALT, AST, bilirubin, GGT, ALP                    | BW, CS, EBL, GA delivery, MSAF                                                                                                         |
| Furrer et al (2016) <sup>6</sup>      | 345         | 1725           | Switzerland  | Retrospective case-control | 22.9% ICP<br>22.8% controls | Database coding, no other liver dysfunction                                                                                                                                                                           | 8                  | 2004-2014              | TBA                                                                  | Apgar score, blood transfusion, BW, EBL, GA delivery, Hb pre- and post- delivery, IOL, MOD, MSAF, NNU, perinatal death, UC arterial pH |

|                                            |      |        |         |                                 |                             |                                                                                                                                                          |   |           |                                                                            |                                                                                                                                                                        |
|--------------------------------------------|------|--------|---------|---------------------------------|-----------------------------|----------------------------------------------------------------------------------------------------------------------------------------------------------|---|-----------|----------------------------------------------------------------------------|------------------------------------------------------------------------------------------------------------------------------------------------------------------------|
| Garcia-Flores et al (2015) <sup>7</sup>    | 47   | 98     | Spain   | Prospective cohort              | 23.4% ICP<br>4.1% controls  | Pruritus, ↑TBA, no other cause for raised bile acids                                                                                                     | 8 | 2012-2014 | TBA, ALT, AST                                                              | Apgar score, birth biometry (e.g. BW, BW centile), GA delivery, IOL, MOD, MSAF, neonatal morbidity, NNU, NRHR, SPTB, UC arterial pH                                    |
| Geenes et al (2014) <sup>8</sup>           | 713  | 2232   | UK      | Prospective population cohort   | 6.2% ICP<br>1.2% controls   | Pruritus without a rash, severe ICP: TBA ≥ 40 μmol/L                                                                                                     | 8 | 2010-2011 | TBA, ALT, AST, bilirubin, GGT                                              | Apgar score, BW, BW centile, GA delivery, IPTB, IUFD, MOD, MSAF, NNU, SPTB                                                                                             |
| Glantz et al (2004) <sup>9</sup>           | 505  | 185    | Sweden  | Prospective cohort              | 5.3% ICP<br>n/a controls    | Gestational pruritus without dermatological cause, ↑TBA                                                                                                  | 8 | 1999-2002 | Pruritus severity, TBA, ALT, AST, bilirubin                                | Asphyxial events, EBL, GA delivery, IOL, IUFD, MOD, MS placenta or membranes, MSAF, PTB                                                                                |
| Grymowicz et al (2016) <sup>10</sup>       | 157  | 46     | Poland  | Prospective case-control        | 19.7% ICP<br>3.0% controls  | Pruritus onset after 20/40, ↑TBA or ALT/AST, no other cause of pruritus, liver disease, or dermatological disease                                        | 8 | 2005-2006 | Pruritus severity, TBA, ALT, AST, bilirubin                                | Apgar score, asphyxial events, BW, congenital anomalies, GA delivery, ICH, IOL, MOD, MSAF ↑ neonatal bilirubin, NNU, RDS                                               |
| Heinonen and Kirkinen (1999) <sup>11</sup> | 91   | 16818  | Finland | Prospective cohort              | 0%                          | Pruritus, ↑TBA, and ALT/AST, post-partum normalisation, no other dermatological condition, or viral hepatitis, normal liver and biliary tract ultrasound | 7 | 1990-1996 | LFTs                                                                       | Anaemia, Apgar score, APH, IUFD, LBW, MOD, MSAF, NNU, NRHRM, PET, placenta praevia, placental abruption, placental/fetal mass, PTB, Rh immunisation, SGA, UC venous pH |
| Herrera et al (2018) <sup>12</sup>         | 487  | 298    | USA     | Retrospective cohort            | 7.8% ICP<br>5.4% controls   | ICD9 codes, ↑TBA                                                                                                                                         | 8 | 2005-2015 | TBA, ALT, AST                                                              | Apgar score, CS, GA delivery, MSAF, neonatal bilirubin, neonatal morbidity, NNU, perinatal death, RDS, SGA, SPTB, UC arterial pH                                       |
| Kebapcilar et al (2010) <sup>13</sup>      | 40   | 40     | Turkey  | Prospective case-control        | n/a                         | Pruritus onset after 20/40, ↑TBA, no other liver disease, or skin disease                                                                                | 5 | 2008-2009 | TBA, ALT, AST, ALP, lipid, and coagulation profiles                        | Apgar score, GA delivery, IUFD, US doppler indices                                                                                                                     |
| Kowalska-Kańska et al (2013) <sup>14</sup> | 33   | 40     | Poland  | Case-control                    | 24.2% ICP<br>15.0% controls | Pruritus, ↑TBA, and ↑ALT/AST, no other cause of pruritus, liver or biliary tract disorder                                                                | 5 | 2009-2011 | Pruritus severity, TBA, ALT, AST, bilirubin, EPO, FBC, coagulation profile | Apgar score, BW, GA delivery, NRHRM, UC arterial pH, pCO <sub>2</sub> , pO <sub>2</sub> , and BE, US indices                                                           |
| Liu et al (2016) <sup>15</sup>             | 1448 | 94 669 | China   | Retrospective population cohort | 9.8% ICP<br>1.9% controls   | Pruritus, ↑TBA                                                                                                                                           | 8 | 2006-2014 | TBA                                                                        | Apgar score, BW, GA delivery, GDM, IOL, IUFD, LGA, MSAF, NND, NNU, PET, PTB, RDS, SGA                                                                                  |

|                                            |     |        |                     |                            |                             |                                                                                                                                                       |   |            |                                                         |                                                                                                                      |
|--------------------------------------------|-----|--------|---------------------|----------------------------|-----------------------------|-------------------------------------------------------------------------------------------------------------------------------------------------------|---|------------|---------------------------------------------------------|----------------------------------------------------------------------------------------------------------------------|
| Oztaş et al (2014) <sup>16</sup>           | 117 | 100    | Turkey              | Prospective case-control   | 0%                          | Pruritus, ↑TBA, and/or ALT/AST, no other dermatological disease, liver disease, renal disease, cholelithiasis, or viral infection affecting the liver | 6 | 2012-2014  | TBA, ALT, AST, bilirubin, GGT, FBC, coagulation profile | Apgar score, BW, GA delivery, IUFD, IUGR, NNU, oligohydramnios, PET, PTB                                             |
| Raz et al (2015) <sup>17</sup>             | 78  | 300    | Israel              | Retrospective cohort       | 30·8% ICP<br>33·3% controls | Pruritus, ↑TBA, and LFTs, no other viral infection affecting the liver, liver disease, or biliary disease                                             | 6 | 2008 -2014 | TBA, LFTs, FBC, proteinuria, PCR, BP                    | Apgar score, BW, BW centile, GA delivery, IOL, IUFD, MOD, MSAF, neonatal complications, NRHRM, PET, PTB, UC blood pH |
| Roncaglia et al (2002) <sup>18</sup>       | 206 | 20815  | Italy               | Prospective cohort         | 5·8% ICP<br>n/a controls    | Pruritus onset in 2 <sup>nd</sup> /3 <sup>rd</sup> trimesters, post-partum normalisation, ↑TBA or ↑ALT/AST, no other cause of pruritus                | 4 | 1989-1997  | Pruritus severity<br>TBA, ALT, AST, bilirubin           | Apgar score, GA delivery, IOL, IUFD, meconium aspiration, MOD, MSAF, oligohydramnios, PTB SGA, UC arterial pH        |
| Sargin Oruç et al (2014) <sup>19</sup>     | 57  | 54     | Turkey              | Prospective case-control   | 0%                          | Pruritus, ↑TBA, no other liver disease, skin, or allergic disorder, symptomatic cholelithiasis, or ongoing viral infection affecting the liver        | 7 | 2012       | TBA, ALT, AST                                           | Apgar score, BW, fetal asphyxia, GA delivery, IOL, IUFD, MSAF, NNU, PTB                                              |
| Shan et al (2016) <sup>20</sup>            | 362 | 1110   | China               | Retrospective cohort       | 100%                        | ICD 10 coding, pruritus, ↑TBA, ALT, AST, no other cause of liver dysfunction, pruritus, gallstones, cholecystitis, or cirrhosis                       | 8 | 2013-2015  | TBA, ALT, AST, LDH                                      | Apgar score, BW, CS, GDM, IUFD, MSAF, NNU, PET, placenta praevia, placental abruption, PPH, PPROM, RDS, SGA          |
| Vural Yılmaz et al (2017) <sup>21</sup>    | 90  | 90     | Turkey              | Prospective case-control   | 0%                          | Pruritus, ↑TBA, and/or ↑ALT/AST, no rash, no other cause of pruritus                                                                                  | 6 | 2014-2016  | TBA, ALT, AST, FBC, red cell distribution width         | Apgar score, BW, GA delivery, BW, MSAF, NNU, SGA                                                                     |
| Wikström Shemer et al (2013) <sup>22</sup> | 333 | 25 537 | Sweden              | Retrospective cohort       | 0%                          | Pruritus, ↑TBA, and/or ↑ALT/AST, no other cause for pruritus                                                                                          | 8 | 2002-2006  | TBA, ALT, AST, bilirubin                                | BW, CS, fetal asphyxia, GDM, IOL, IUFD, PET, PPH, PTB                                                                |
| Wong et al (2008) <sup>23</sup>            | 151 | 602    | Republic of Ireland | Retrospective case-control | 9·3% ICP<br>5·2% controls   | Pruritus, ↑TBA ± LFTs, no other cause for raised TBA                                                                                                  | 6 | 2004-2006  | TBA                                                     | Apgar score, BW centile, GA delivery, IOL, NNU, NRHRM, PTB                                                           |
| Zhang et al (2014) <sup>24</sup>           | 40  | 42     | China               | Prospective case-control   | 0%                          | Pruritus, post-partum normalisation, ↑TBA,                                                                                                            | 4 | 2011-2012  | TBA, ALT, AST, bilirubin, ALP, lipid                    | Apgar score, BW, fetal distress, GA delivery, IUFD, MSAF, SPTB                                                       |

|  |  |  |  |  |  |                                                                                                                                                                                                    |  |  |                          |  |
|--|--|--|--|--|--|----------------------------------------------------------------------------------------------------------------------------------------------------------------------------------------------------|--|--|--------------------------|--|
|  |  |  |  |  |  | ALT/AST, no other cause of pruritus, autoimmune disorders, hepatitis viral infection, moderate to severe alcohol intake, biliary obstruction, or the use of drugs that can precipitate cholestasis |  |  | profile, serum cytokines |  |
|--|--|--|--|--|--|----------------------------------------------------------------------------------------------------------------------------------------------------------------------------------------------------|--|--|--------------------------|--|

Data quality was determined by the Newcastle-Ottawa case-control scale at study-level. alb: albumin, ALP: Alkaline phosphatase, ALT: alanine transaminase, APH: antepartum haemorrhage, AST: aspartate aminotransferase, BE: base excess, BP: blood pressure, BW: birthweight, CS: caesarean section, EBL: estimated blood loss, EPO: erythropoietin, FBC: full blood count, GA delivery: gestational age of delivery, GDM: gestational diabetes mellitus, GGT: Gamma-glutamyl transferase, Hb: haemoglobin, ICD: International Classification of Disease, ICH: intra-cerebral haemorrhage, IOL: induction of labour, IPTB: iatrogenic preterm birth, IUFD: intrauterine fetal death, IUGR: intrauterine growth restriction, LBW: low birthweight, LDH: lactate dehydrogenase, LFTs: liver function tests, LGA: large for gestational age, MOD: mode of delivery, MS: meconium-staining, MSAF: meconium-staining of the amniotic fluid, n/a: not available, NND: neonatal death, NNU: neonatal unit admission, NRHRM: non-reassuring heart rate monitoring, pCO<sub>2</sub>: partial pressure of carbon dioxide, PCR: protein creatinine ratio, PET: pre-eclampsia, pO<sub>2</sub>: partial pressure of oxygen, PPH: post-partum haemorrhage, PPROM: preterm prelabour rupture of membranes, PTB: preterm birth, RDS: respiratory distress syndrome, Rh: Rhesus group, SGA: small for gestational age, SPTB: spontaneous preterm birth, TBA: serum total bile acids, UC: umbilical cord, US: ultrasound

**Table 3. Studies used for individual patient data analysis**

|                                     | Number of cases | Country     | Design                      | Definition of ICP used                                                                                                                                                                                                | Data quality (NHLBI) | Data collection period | Major predictors reported                                                  | Method of bile acid measurement            | Outcome measures reported                                                                                                                      |
|-------------------------------------|-----------------|-------------|-----------------------------|-----------------------------------------------------------------------------------------------------------------------------------------------------------------------------------------------------------------------|----------------------|------------------------|----------------------------------------------------------------------------|--------------------------------------------|------------------------------------------------------------------------------------------------------------------------------------------------|
| Bacq et al (2017) <sup>25</sup>     | 82              | France      | Retrospective cohort        | Gestational pruritus, ↑TBA or ALT on two occasions, no other liver disorder, or dermatoses of pregnancy                                                                                                               | 8                    | 1999-2013              | Pruritus severity, TBA, ALT, AST, bilirubin, GGT, ALP, ABCB4 mutations, PT | Enzymatic colorimetric (Enzabile, biostat) | ↓ biochemical markers, CS, GA delivery, IOL, PTB                                                                                               |
| Brouwers et al (2015) <sup>26</sup> | 216             | Netherlands | Retrospective cohort        | Gestational pruritus, ↑TBA                                                                                                                                                                                            | 8                    | 2005-2012              | TBA, ALT, AST, bilirubin, GGT, ALP, LDH                                    | Enzymatic colorimetric (Sentinel)          | Apgar score, BW, fetal asphyxia, IOL, MOD, MSAF, NNU, perinatal death, PPH, PTB, UC arterial pH, UC blood TBA                                  |
| Castañó et al (2006) <sup>3</sup>   | 44              | Argentina   | Prospective case-control    | Pruritus, ↑TBA, and ↑ALT/AST after 20/40, no other autoimmune disease, moderate-severe alcohol intake, HIV infection, Hepatitis A, B, or C infection, skin disease, or biliary obstruction, post-partum normalisation | 8                    | 2004-2005              | Pruritus severity, TBA, individual BA, ALT, AST, bilirubin, GGT, ALP       | Capillary electrophoresis and HPLC         | Apgar score, BW, GA delivery, SGA                                                                                                              |
| Chappell et al (2012) <sup>27</sup> | 128             | UK          | Randomised controlled trial | Gestational pruritus, ↑TBA or ALT, no other cause of pruritus or liver dysfunction (except concurrent hepatitis C or cholelithiasis)                                                                                  | 8                    | 2008-2011              | Pruritus severity, TBA, ALT, AST, bilirubin, GGT                           | Clinical laboratory                        | Apgar score, BW, EBL, GA delivery, IOL, IUFD, MOD, MSAF, neonatal convulsions, jaundice or ventilation, NNU, PTB, UC arterial pH, UC venous pH |
| Chen et al (2013) <sup>28</sup>     | 38              | China       | Prospective case-control    | Pruritus after 28/40, ↑TBA, and ↑ALT/AST, no chronic liver disease or symptomatic cholelithiasis, post-partum normalisation                                                                                           | 7                    | 2007-2008              | TBA, ALT, AST, bilirubin, GGT, ALP                                         | HPLC-MS/MS                                 | GA delivery, IUFD, MSAF, NRHRM, SPTB                                                                                                           |
| Cui et al (2018) <sup>4</sup>       | 42              | China       | Prospective case-control    | As per RCOG Guideline 2 <sup>nd</sup> edition: i.e. gestational pruritus, ↑TBA and/or ↑ALT/AST, postpartum resolution, no other cause of itching or liver dysfunction <sup>5</sup>                                    | 7                    | 2012-2015              | TBA, individual BA, ALT, AST, bilirubin, GGT, ALP                          | Clinical laboratory                        | BW, CS, EBL, GA delivery, MSAF                                                                                                                 |



|                                      |     |             |                                     |                                                                                                                   |   |           |                                                                  |                                           |                                                                                                                                                                                                   |
|--------------------------------------|-----|-------------|-------------------------------------|-------------------------------------------------------------------------------------------------------------------|---|-----------|------------------------------------------------------------------|-------------------------------------------|---------------------------------------------------------------------------------------------------------------------------------------------------------------------------------------------------|
| Estiú et al (2017) <sup>29</sup>     | 400 | Argentina   | Prospective cohort                  | Pruritus, ↑TBA, no other cause for pruritus, or hepatic disease                                                   | 8 | 2009-2013 | TBA                                                              | Enzymatic colorimetric (Randox)           | Apgar score, BW, fetal asphyxia, GA delivery, IUFD, LGA, meconium aspiration syndrome, MSAF, NNU, NRHRM, perinatal death, placental abruption, PTB, SGA                                           |
| Furrer et al (2016) <sup>6</sup>     | 344 | Switzerland | Retrospective case-control          | Database coding                                                                                                   | 7 | 2004-2014 | TBA                                                              | Clinical laboratory                       | Apgar score, blood transfusion, BW, EBL, GA delivery, Hb pre- and post- delivery, IOL, MOD, MSAF, NNU, perinatal death, UC arterial pH                                                            |
| Geenes et al (2014) <sup>8</sup>     | 708 | UK          | Prospective population-based cohort | Pruritus without a rash, severe ICP: TBA ≥ 40 μmol/L                                                              | 8 | 2010-2011 | TBA, ALT, AST, bilirubin, GGT                                    | Clinical laboratory                       | Apgar score, BW, BW centile, GA delivery, IPTB, IUFD, MOD, MSAF, NNU, SPTB                                                                                                                        |
| Glantz et al (2007) <sup>30</sup>    | 40  | Sweden      | Prospective cohort                  | Gestational pruritus without dermatological cause, ↑TBA                                                           | 8 | 1999-2002 | Pruritus severity, TBA, urine BA, ALT, bilirubin, urine steroids | Clinical laboratory                       | Pruritus severity. Additional outcome measures reported in Glantz et al 2005: fetal asphyxia, EBL, IOL, MSAF, MS placenta and membranes, PTB, SPTB                                                |
| Grymowicz et al (2016) <sup>10</sup> | 157 | Poland      | Prospective case-control            | Pruritus onset after 20/40, ↑TBA or ALT/AST, no other cause of pruritus, liver disease, or dermatological disease | 8 | 2005-2006 | Pruritus severity, TBA, ALT, AST, bilirubin                      | Enzymatic colorimetric (Enzabile Biostat) | Apgar score, BW, congenital anomalies, fetal asphyxia, GA delivery, ICH, IOL, MOD, MSAF, ↑neonatal bilirubin, NNU, RDS                                                                            |
| Günaydin et al (2017) <sup>31</sup>  | 38  | Turkey      | Retrospective cohort                | ICD codes, ↑TBA                                                                                                   | 6 | 2015      | ↑TBA, ALT, AST, bilirubin, GGT, LDH, coagulation profile         | Clinical laboratory                       | Anaesthesia, Apgar score, BW, GA delivery, IUFD, MOD, SPTB                                                                                                                                        |
| Kawakita et al (2015) <sup>32</sup>  | 233 | USA         | Retrospective cohort                | Pruritus, ↑TBA, no rash                                                                                           | 8 | 2009-2014 | TBA, AST, ALT                                                    | Enzymatic colorimetric (Enzabile)         | Blood transfusion, BW, chorioamnionitis, endometritis, GA delivery, IOL, IUFD, IUGR, MOD, MSAF, ↑neonatal bilirubin, NNU, NRHRM, oligohydramnios, placental abruption, PPH, PPROM, RDS, SPTB, TTN |

|                                            |     |           |                          |                                                                                                                                                                                                          |   |           |                                                                            |                                                 |                                                                                                                                                                                                                |
|--------------------------------------------|-----|-----------|--------------------------|----------------------------------------------------------------------------------------------------------------------------------------------------------------------------------------------------------|---|-----------|----------------------------------------------------------------------------|-------------------------------------------------|----------------------------------------------------------------------------------------------------------------------------------------------------------------------------------------------------------------|
| Kebapcilar et al (2010) <sup>13</sup>      | 40  | Turkey    | Prospective case-control | Pruritus onset after 20/40, ↑TBA, no other liver disease, or skin disease                                                                                                                                | 7 | 2008-2009 | TBA, ALT, AST, ALP, lipid, and coagulation profiles                        | Clinical laboratory                             | Apgar score, GA delivery, IUFD, US doppler indices                                                                                                                                                             |
| Kenyon et al (2002) <sup>33</sup>          | 73  | UK        | Prospective cohort       | Pruritus, ↑TBA or ↑ALT/AST/GGT, no other liver disease, postnatal resolution                                                                                                                             | 8 | 1999-2001 | Pruritus                                                                   | Enzymatic colorimetric (Biochemical Enterprise) | APH, IOL, IPTB, IUFD, MOD, MSAF, NNU, NRHRM, PPH, SGA, SPTB                                                                                                                                                    |
| Kohari et al (2017) <sup>34</sup>          | 857 | USA       | Retrospective cohort     | Pruritus, ↑TBA                                                                                                                                                                                           | 7 | 2005-2013 | TBA, ALT, AST                                                              | Clinical laboratory                             | Apgar score, BW, chorioamnionitis, GA delivery, IOL, IUFD, MOD, MSAF, neonatal antibiotic use, NNU, NRHRM, PPRM, RDS, SGA, UC arterial pH                                                                      |
| Kondrackiene et al (2007) <sup>35</sup>    | 66  | Lithuania | Retrospective cohort     | Pruritus onset in 2 <sup>nd</sup> /3 <sup>rd</sup> trimesters, ↑TBA, no other liver disease, skin disease, allergic disorder, symptomatic cholelithiasis, or ongoing viral infection affecting the liver | 7 | 1999-2002 | Pruritus severity, TBA, LFTs                                               | Clinical laboratory                             | Apgar score, BW, fetal asphyxia, GA delivery, MOD, SPTB                                                                                                                                                        |
| Kowalska-Kańska et al (2013) <sup>14</sup> | 41  | Poland    | Case-control             | Pruritus, ↑TBA, and ↑ALT/AST, no other cause of pruritus, liver or biliary tract disorder                                                                                                                | 7 | 2009-2011 | Pruritus severity, TBA, ALT, AST, bilirubin, EPO, FBC, coagulation profile | Enzymatic colorimetric (Randox)                 | Apgar score, BW, GA delivery, NRHRM, UC arterial pH, pCO <sub>2</sub> , pO <sub>2</sub> , and BE, US indices                                                                                                   |
| Lee et al (2008) <sup>36</sup>             | 117 | USA       | Retrospective cohort     | ICP notes coding, pruritus, ↑TBA, no rash                                                                                                                                                                | 7 | 2000-2007 | TBA, ALT, AST, bilirubin                                                   | Clinical laboratory                             | Apgar score, BW, chorioamnionitis, EBL, IOL, IUFD, MOD, MSAF, NRHRM, PPH, SGA, SPTB, UC arterial pH                                                                                                            |
| Marathe et al (2017) <sup>37</sup>         | 344 | Australia | Retrospective cohort     | Pruritus, ↑TBA                                                                                                                                                                                           | 8 | 2000-2010 | TBA                                                                        | Enzymatic colorimetric (Enzabile, Randox)       | Apgar score, BW, feeding difficulties, GA delivery, IUFD, length of hospital stay, LGA, mechanical ventilation, MOD, MSAF, neonatal hypoglycaemia, neonatal jaundice, NNU, RDS, SGA, SPTB, TTN, UC arterial pH |

|                                        |     |        |                            |                                                                                                                                                                                    |     |                       |                                                   |                                  |                                                                                                                                                               |
|----------------------------------------|-----|--------|----------------------------|------------------------------------------------------------------------------------------------------------------------------------------------------------------------------------|-----|-----------------------|---------------------------------------------------|----------------------------------|---------------------------------------------------------------------------------------------------------------------------------------------------------------|
| Raz et al (2015) <sup>17</sup>         | 78  | Israel | Retrospective cohort       | Pruritus, ↑TBA, and LFTs, no other viral infection affecting the liver, liver disease, or biliary disease                                                                          | 8   | 2008-2014             | TBA, LFTs, FBC, proteinuria, PCR, BP              | Enzymatic colorimetric (Diazyme) | Apgar score, BW, BW centile, GA delivery, IOL, IUFD, MOD, MSAF, neonatal complications, NRHRM, PET, PTB, UC blood pH                                          |
| Roncaglia et al (2002) <sup>18</sup>   | 207 | Italy  | Prospective cohort         | Pruritus onset in 2 <sup>nd</sup> /3 <sup>rd</sup> trimesters, post-partum normalisation, ↑TBA or ↑ALT/AST, no other cause of pruritus                                             | 8   | 1989-1997             | Pruritus severity, TBA, ALT, AST, bilirubin, BP   | Clinical laboratory              | Apgar score, GA delivery, IOL, IUFD, meconium aspiration, MOD, MSAF, oligohydramnios, PTB, SGA, UC arterial pH                                                |
| Rook et al (2012) <sup>38</sup>        | 101 | USA    | Retrospective cohort       | ICD9 coding, pruritus, onset in 2 <sup>nd</sup> /3 <sup>rd</sup> trimesters, no other cause for pruritus, chronic liver disease, acute fatty liver of pregnancy, or HELLP syndrome | 8   | 2005-2009             | TBA, individual BA, ALT, AST, bilirubin, ALP, alb | Clinical laboratory              | Apgar score, BW, congenital anomalies, fetal distress, GA delivery, IOL, meconium aspiration, MOD, MSAF, ↑neonatal bilirubin, neonatal pneumonia, RDS, sepsis |
| Shan et al (2016) <sup>20</sup>        | 362 | China  | Retrospective cohort       | ICD 10 coding, pruritus, ↑TBA, ALT, AST, no other cause of liver dysfunction, pruritus, gallstones, cholecystitis, or cirrhosis                                                    | 9   | 2013-2015             | TBA, ALT, AST, LDH                                | Clinical laboratory              | Apgar score, BW, CS, GDM, IUFD, MSAF, NNU, PET, placenta praevia, placental abruption, PPH, PPROM, RDS, SGA                                                   |
| Yayla Abide et al (2017) <sup>39</sup> | 91  | Turkey | Retrospective case-control | Pruritus, ↑TBA, no other cause, no other liver disease                                                                                                                             | 9   | 2013-2016             | TBA, ALT, AST, GGT, ALP, LDH, FBC, fibrinogen     | Enzymatic colorimetric (Diazyme) | Apgar score, BW, CS, GA delivery, IUFD, MSAF, NND, NNU                                                                                                        |
| Imperial                               | 313 | UK     | Prospective cohort         | Gestational pruritus, ↑TBA, no other cause for pruritus, or hepatic dysfunction                                                                                                    | N/a | 2006–2010, 2011–2017* | Pruritus severity, TBA, ALT, AST, bilirubin       | Clinical laboratory              | Apgar score, BW, EBL, GA delivery, GDM, IOL, IUFD, MOD, MSAF, NND, NNU, NRHRM, PTB, SPTB, UC arterial pH                                                      |
| GSTT                                   | 109 | UK     | Prospective cohort         | Gestational pruritus, ↑TBA, no other cause for pruritus, or hepatic dysfunction                                                                                                    | N/a | 2011–2017*            | Pruritus severity, TBA, ALT, AST, bilirubin       | Clinical laboratory              | Apgar score, BW, EBL, GA delivery, GDM, IOL, IUFD, MOD, MSAF, NND, NNU, NRHRM, PTB, SPTB, UC arterial pH                                                      |

Data quality was determined by the NHLBI Quality Assessment Tool for Case Series Studies. \*Participants that gave birth between 2010-2011 were not included to avoid duplication with the recruitment period for Geenes *et al.*, 2014<sup>8</sup>. alb: albumin, ALP: Alkaline phosphatase, ALT: alanine transaminase, AST: aspartate aminotransferase, BE: base excess, BP: blood pressure, BW: birthweight, CS: caesarean section, EBL: estimated blood loss, EPO: erythropoietin, FBC: full blood count, GA delivery: gestational age of delivery, GDM: gestational diabetes mellitus, GGT: Gamma-glutamyl transferase, Hb: haemoglobin, HELLP: haemolysis, elevated liver enzymes, low platelets, HPLC: high performance liquid chromatography, ICD: International Classification of Disease, ICH: intra-cerebral haemorrhage, IOL: induction of labour, IPTB: iatrogenic preterm birth, IUFD: intrauterine fetal death, IUGR: intrauterine growth restriction,

LDH: lactate dehydrogenase, LFTs: liver function tests, LGA: large for gestational age, MOD: mode of delivery, MS: meconium-staining, MSAF: meconium-staining of the amniotic fluid, N/a: not applicable; NND: neonatal death, NNU: neonatal unit admission, NOS: Newcastle-Ottawa score, NRHRM: non-reassuring heart rate monitoring, pCO<sub>2</sub>: partial pressure of carbon dioxide, pO<sub>2</sub>: partial pressure of oxygen, PPH: post-partum haemorrhage, PPRM: preterm prelabour rupture of membranes, PTB: preterm birth, RCT: randomised controlled trial, RDS: respiratory distress syndrome, SGA: small for gestational age, SPTB: spontaneous preterm birth, TBA: serum total bile acids, TTN: transient tachypnoea of the newborn, UC: umbilical cord, US: ultrasound

**Table 4. Studies not included in individual patient data analysis for which data were requested**

|                                            | Number of cases | Country             | Design                          | Included in aggregate data meta-analysis? | Data collection period | Reason not included in IPD analysis |
|--------------------------------------------|-----------------|---------------------|---------------------------------|-------------------------------------------|------------------------|-------------------------------------|
| Al Shobaili et al (2011) <sup>1</sup>      | 76              | Saudi Arabia        | Prospective cohort              | Yes                                       | 2008-2010              | No reply                            |
| Ataalla et al (2016) <sup>2</sup>          | 98              | Egypt               | Prospective case-control        | Yes                                       | 2011-2013              | No reply                            |
| Garcia-Flores et al (2015) <sup>7</sup>    | 47              | Spain               | Prospective cohort              | Yes                                       | 2012-2014              | Data not available                  |
| Glantz et al (2004) <sup>9</sup>           | 505             | Sweden              | Prospective cohort              | Yes                                       | 1999-2002              | Data not available                  |
| Heinonen and Kirkinen (1999) <sup>11</sup> | 91              | Finland             | Prospective population cohort   | Yes                                       | 1990-1996              | Data not available                  |
| Herrera et al (2018) <sup>12</sup>         | 487             | USA                 | Retrospective cohort            | Yes                                       | 2005-2015              | No reply                            |
| Liu et al (2016) <sup>15</sup>             | 1319            | China               | Retrospective population cohort | Yes                                       | 2006-2014              | Data not available                  |
| Oztas et al (2015) <sup>16</sup>           | 117             | Turkey              | Prospective case-control        | Yes                                       | 2012-2014              | No reply                            |
| Sargin Oruç et al (2014) <sup>19</sup>     | 57              | Turkey              | Prospective case-control        | Yes                                       | 2012                   | Duplicate dataset                   |
| Vural Yilmaz et al (2017) <sup>21</sup>    | 90              | Turkey              | Prospective case-control        | Yes                                       | 2014-2016              | No reply                            |
| Wikström Shemer et al (2013) <sup>22</sup> | 333             | Sweden              | Retrospective cohort            | Yes                                       | 2002-2006              | Data not available                  |
| Wong et al (2008) <sup>23</sup>            | 151             | Republic of Ireland | Retrospective cohort            | Yes                                       | 2004-2006              | No reply                            |
| Zhang et al (2014) <sup>24</sup>           | 40              | China               | Prospective case-control        | Yes                                       | 2011-2012              | No reply                            |
| Binder et al (2006) <sup>40</sup>          | 78              | Czech Republic      | Randomised controlled trial     | No                                        | 1999-2004              | Data not available                  |
| Bolukbas et al (2017) <sup>41</sup>        | 59              | Turkey              | Retrospective cohort            | No                                        | 2007-2014              | No reply                            |
| Chen et al (2013) <sup>42</sup>            | 106             | China               | Retrospective cohort            | No                                        | 1990-2011              | No reply                            |
| Erkenekli et al (2015) <sup>43</sup>       | 103             | Turkey              | Retrospective cohort            | No                                        | 2008-2013              | No reply                            |
| Friberg et al (2016) <sup>44</sup>         | 113             | Denmark             | Retrospective cohort            | No                                        | 2006-2011              | No reply                            |
| Jin et al (2015) <sup>45</sup>             | 371             | China               | Retrospective cohort            | No                                        | 1993-2014              | No reply                            |
| Joutsiniemi et al (2015) <sup>46</sup>     | 103             | Turkey              | Prospective cohort              | No                                        | 2008-2013              | Data not available                  |
| Koroglu et al (2017)                       | 40              | Turkey              | Prospective case-control        | No                                        | 2016-2017              | Data not available                  |
| Labbe et al (2018) <sup>47</sup>           | 138             | France              | Retrospective cohort            | No                                        | 2008-2014              | Data not available                  |
| Lin et al (2017) <sup>48</sup>             | 407             | China               | Retrospective cohort            | No                                        | 2014-2016              | No reply                            |
| Madazli et al (2015) <sup>49</sup>         | 89              | Turkey              | Retrospective cohort            | No                                        | 2003-2013              | No reply                            |
| Oztekin et al (2009) <sup>50</sup>         | 187             | Turkey              | Retrospective cohort            | No                                        | 2004-2008              | No reply                            |
| Pata et al (2011) <sup>51</sup>            | 32              | Turkey              | Cohort                          | No                                        | 2006-2010              | No reply                            |
| Riikonen et al (2000) <sup>52</sup>        | 39              | Finland             | Randomised controlled trial     | No                                        | ≤1998                  | Data not available                  |
| Zecca et al (2008) <sup>53</sup>           | 77              | Italy               | Retrospective cohort            | No                                        | 2000-2004              | No reply                            |
| Zhang et al (2015) <sup>54</sup>           | 120             | China               | Randomised controlled trial     | No                                        | 2009-2011              | No reply                            |

IPD: individual patient data, UK: United Kingdom; USA: United States of America

**Table 5. Demographic and pregnancy characteristics of women included in the systematic review and IPD analysis**

|                                                        | <b>Cases<br/>(data set 1 -<br/>study level)</b> | <b>Controls<br/>(data set 1 -<br/>study level)</b> | <b>Cases<br/>(data set 2 -<br/>IPD level)</b> | <b>Comparison 1<br/>data set 1 cases<br/>vs controls</b> | <b>Comparison 2<br/>data set 1 cases vs<br/>data set 2 cases</b> |
|--------------------------------------------------------|-------------------------------------------------|----------------------------------------------------|-----------------------------------------------|----------------------------------------------------------|------------------------------------------------------------------|
| Maternal age<br>(years)<br>mean (SD)<br>N=3237         | 30.0<br>(6.1)                                   | 30.2<br>(5.5)<br>N=34 863                          | 29.7<br>(6.0)<br>N=5228                       | Mean diff -0.2<br>(-0.4 to 0.0)                          | Mean diff 0.3<br>(0.0 to 0.6)                                    |
| BMI (kg/m <sup>2</sup> )<br>mean (SD)<br>N=2768        | 25.4<br>(8.1)                                   | 23.8<br>(4.7)<br>N=7796                            | 24.8<br>(5.2)<br>N=2464                       | Mean diff 1.6<br>(1.3 to 1.9)                            | Mean diff 0.6<br>(0.2 to 1.0)                                    |
| Ethnicity<br>n (%):                                    |                                                 |                                                    |                                               |                                                          |                                                                  |
| White                                                  | 1054<br>(38.9)                                  | 2035<br>(46.8)                                     | 3488<br>(73.6)                                | OR 0.7<br>(0.7 to 0.8)                                   | OR 0.2<br>(0.1 to 0.3)                                           |
| Asian                                                  | 1483<br>(54.7)                                  | 2033<br>(46.7)                                     | 867<br>(18.3)                                 | OR 1.4<br>(1.2 to 1.9)                                   | OR 5.4<br>(4.9 to 6.0)                                           |
| Black                                                  | 24<br>(0.9)                                     | 131<br>(3.0)                                       | 130<br>(2.7)                                  | OR 0.3<br>(0.2 to 0.4)                                   | OR 0.3<br>(0.2 to 0.5)                                           |
| Mixed/Other                                            | 151<br>(5.6)<br>N=2712                          | 151<br>(3.5)<br>N=4350                             | 255<br>(5.4)<br>N=4740                        | OR 1.6<br>(1.3 to 2.1)                                   | OR 1.0<br>(0.8 to 1.3)                                           |
| Nulliparity<br>n (%)<br>N=2688                         | 1499<br>(55.8)                                  | 20 140<br>(59.0)<br>N=34 152                       | 1874<br>(36.9)<br>N=5076                      | OR 0.9<br>(0.8 to 0.9)                                   | OR 2.2<br>(2.0 to 2.4)                                           |
| Multifetal<br>pregnancy<br>n (%)<br>N=4453             | 760<br>(17.1)                                   | 3489<br>(2.8)<br>N=125 417                         | 752*<br>(14.3)<br>N=5270                      | OR 7.2<br>(6.6 to 7.8)                                   | OR 1.2<br>(1.1 to 1.4)                                           |
| Pre-eclampsia<br>n (%)<br>N=1876                       | 228<br>(12.2)                                   | 3385<br>(3.4)<br>N=94 386                          | 312<br>(7.1)<br>N=4384                        | OR 3.7<br>(3.2 to 4.3)                                   | OR 1.8<br>(1.5 to 2.2)                                           |
| Gestational<br>diabetes<br>mellitus<br>n (%)<br>N=1806 | 239<br>(13.2)                                   | 5571<br>(5.9)<br>N=94384                           | 522<br>(14.7)<br>N=3545                       | OR 2.4<br>(2.1 to 2.8)                                   | OR 0.9<br>(0.7 to 1.0)                                           |

\*747=twin, 5=triplet pregnancies. Comparisons show mean difference or odds ratio with 95% confidence intervals. BMI: body mass index, CI: confidence interval, Mean diff: mean difference, n: number of women with characteristic, N: number of women reporting these data, OR: odds ratio, SD: standard deviation.

**Table 6. Description of ICP disease**

|                                                        | <b>Cases<br/>(data set 1 -<br/>study level)</b> | <b>Controls<br/>(data set 1 -<br/>study level)</b> | <b>Cases<br/>(data set 2 -<br/>IPD level)</b> | <b>Comparison 1<br/>data set 1 cases vs<br/>controls</b> | <b>Comparison 2<br/>data set 2 cases vs<br/>data set 1 cases</b> |
|--------------------------------------------------------|-------------------------------------------------|----------------------------------------------------|-----------------------------------------------|----------------------------------------------------------|------------------------------------------------------------------|
| Total bile acids<br>( $\mu\text{mol/L}$ )<br>mean (SD) | 45.4<br>(42.6)<br>N=2799                        | 6.0<br>(4.1)<br>N=555                              | 50.1<br>(50.2)<br>N=5159                      | Mean diff 39.4<br>(37.8 to 41.0)                         | Mean diff 4.7<br>(2.6 to 6.8)                                    |
| ALT (iU/L)<br>mean (SD)                                | 147.6<br>(165.5)<br>N=2252                      | 25.9<br>(21.8)<br>N=718                            | 157.7<br>(171.7)<br>N=4477                    | Mean diff 121.7<br>(109.6 to 133.8)                      | Mean diff 10.1<br>(1.5 to 18.7)                                  |
| AST (iU/L)<br>mean (SD)                                | 105.0<br>(108.6)<br>N=2146                      | 20.9<br>(11.7)<br>N=518                            | 105.7<br>(114.8)<br>N=3845                    | Mean diff 84.1<br>(74.7 to 93.5)                         | Mean diff 0.7<br>(-5.2 to 6.6)                                   |
| Bilirubin<br>( $\mu\text{mol/L}$ )<br>mean (SD)        | 12.9<br>(7.5)<br>N=1548                         | 7.1<br>(3.8)<br>N=532                              | 14.7<br>(12.5)<br>N=2962                      | Mean diff 5.8<br>(5.1 to 6.5)                            | Mean diff -1.8<br>(1.1 to 2.5)                                   |
| UDCA<br>treatment<br>n (%)                             | 2112<br>(67.9)<br>N=3112                        | n/a                                                | 3304<br>(65.6)<br>N=5034                      | n/a                                                      | OR 0.9<br>(0.8 to 1.0)                                           |
| Bile acids<br>taken fasting<br>n (%)                   | 934<br>(42.6)<br>N=2190                         | 505<br>(100.0)<br>N=505                            | 1726<br>(32.8)<br>N=5270                      | OR 0.0<br>(0.0 to 0.0)                                   | OR 0.7<br>(0.6 to 0.7)                                           |

Comparisons show mean difference or odds ratio, and 95% confidence interval. ALT: alanine aminotransferase, AST: aspartate aminotransferase, CI: confidence interval, IPD: individual patient data, mean diff: mean difference, n: number of women with characteristic, N: number of women reporting these data, OR: odds ratio, SD: standard deviation, UDCA: ursodeoxycholic acid.

**Table 7. Summary table of results – aggregate data case-control comparisons**

| Perinatal outcome               | Number of cases | Number of controls | Aggregate data comparison – ICP vs control     |                       |
|---------------------------------|-----------------|--------------------|------------------------------------------------|-----------------------|
|                                 |                 |                    | Weighted mean difference / Odds ratio (95% CI) | Tau-squared (p value) |
| Stillbirth                      | 45/5427         | 519/164601         | 1.46<br>(0.73 to 2.89)                         | 0.81<br>(0.0016)      |
| Preterm birth                   | 1270/4289       | 10956/160822       | 3.54<br>(2.72 to 4.62)                         | 0.18<br>(<0.0001)     |
| Spontaneous preterm birth       | 412/3080        | 4892/121208        | 3.47<br>(3.06 to 3.95)                         | 0.55<br>(<0.0001)     |
| Iatrogenic preterm birth        | 305/2576        | 2440/121011        | 3.65<br>(1.94 to 6.85)                         | 0.61<br>(<0.0001)     |
| Gestation at delivery (weeks)   | 2276<br>(37.1)  | 7007<br>(37.8)     | -1.48<br>(-1.96 to -1.01)                      | 0.83<br>(<0.0001)     |
| Caesarean section               | 942/2846        | 12312/69235        | 1.16<br>(0.92 to 1.48)                         | 0.14<br>(<0.0001)     |
| Meconium stained amniotic fluid | 360/1910        | 2401/22260         | 2.60<br>(1.62 to 4.16)                         | 0.51<br>(<0.0001)     |
| Apgar <7 at 5 minutes           | 48/1766         | 571/31943          | 1.41<br>(0.95 to 2.10)                         | 0.00<br>(0.47)        |
| Neonatal unit admission         | 517/2175        | 3367/26005         | 2.12<br>(1.48 to 3.03)                         | 0.24<br>(<0.0001)     |
| Birthweight centile             | 818             | 2703               | 0.60<br>(-6.21 to 7.41)                        | 35.18<br>(0.0051)     |

Comparisons using random effects model. CI: confidence interval. Meta-regression was performed to assess the effect of confounders on outcomes presented; assessments of study quality (determined by Newcastle-Ottawa score), the inclusion of multifetal pregnancies versus singleton pregnancies, and use of uncomplicated pregnancies as controls versus pregnant women with pruritus but normal total bile acids did not significantly contribute to the heterogeneity of the results ( $p > 0.05$  throughout), with the exception of the effect of study quality on proportions of pregnancies with meconium-staining of the amniotic fluid ( $p = 0.0108$ ).



**Table 8. Summary of IPD associations between serum biochemistry and adverse perinatal outcome for multifetal pregnancies**

| <b>Perinatal outcome</b>              | <b>Bile acids<br/>ROC AUC<br/>(95% CI)<br/>(n/N)</b> | <b>ALT<br/>ROC AUC<br/>(95% CI)<br/>(n/N)</b> | <b>AST<br/>ROC AUC<br/>(95% CI)<br/>(n/N)</b> | <b>Bilirubin<br/>ROC AUC<br/>(95% CI)<br/>(n/N)</b> |
|---------------------------------------|------------------------------------------------------|-----------------------------------------------|-----------------------------------------------|-----------------------------------------------------|
| Stillbirth                            | 0.48<br>(0.34 to 0.63)<br>(14/748)                   | 0.47<br>(0.30 to 0.65)<br>(14/642)            | 0.52<br>(0.35 to 0.68)<br>(14/608)            | 0.49<br>(0.00 to 1.00)<br>(3/253)                   |
| Preterm birth                         | 0.57<br>(0.51 to 0.62)<br>(598/747)                  | 0.59<br>(0.50 to 0.68)<br>(160/207)           | 0.61<br>(0.52 to 0.69)<br>(160/207)           | 0.48<br>(0.39 to 0.57)<br>(160/207)                 |
| Spontaneous preterm birth             | 0.55<br>(0.49 to 0.61)<br>(165/434)                  | 0.55<br>(0.47 to 0.64)<br>(75/199)            | 0.57<br>(0.49 to 0.66)<br>(75/199)            | 0.37<br>(0.28 to 0.45)<br>(75/199)                  |
| Iatrogenic preterm birth              | 0.57<br>(0.51 to 0.62)<br>(120/434)                  | 0.52<br>(0.43 to 0.61)<br>(77/199)            | 0.51<br>(0.43 to 0.60)<br>(77/199)            | 0.62<br>(0.54 to 0.70)<br>(77/199)                  |
| Meconium stained amniotic fluid       | 0.59<br>(0.53 to 0.65)<br>(101/714)                  | 0.51<br>(0.40 to 0.63)<br>(29/179)            | 0.48<br>(0.39 to 0.63)<br>(29/179)            | 0.40<br>(0.35 to 0.60)<br>(29/179)                  |
| Non-reassuring heart rate monitoring  | 0.66<br>(0.56 to 0.76)<br>(42/198)                   | 0.62<br>(0.48 to 0.76)<br>(23/140)            | 0.67<br>(0.54 to 0.79)<br>(23/140)            | 0.41<br>(0.27 to 0.55)<br>(23/140)                  |
| Apgar <7 at 5 minutes                 | 0.49<br>(0.39 to 0.59)<br>(30/739)                   | 0.61<br>(0.40 to 0.81)<br>(11/203)            | 0.66<br>(0.48 to 0.85)<br>(11/203)            | 0.48<br>(0.26 to 0.70)<br>(11/203)                  |
| Umbilical cord arterial blood pH <7.0 | 0.67<br>(0.46 to 0.89)<br>(4/221)                    | 0.15<br>(0.00 to 0.35)<br>(3/87)              | 0.10<br>(0.00 to 0.20)<br>(3/87)              | 0.57<br>(0.11 to 1.00)<br>(3/87)                    |
| Neonatal unit admission               | 0.55<br>(0.51 to 0.60)<br>(298/719)                  | 0.49<br>(0.41 to 0.58)<br>(77/181)            | 0.50<br>(0.42 to 0.59)<br>(77/181)            | 0.65<br>(0.58 to 0.73)<br>(77/181)                  |
| Neonatal death                        | 0.57<br>(0.29 to 0.85)<br>(6/246)                    | 0.62<br>(0.43 to 0.82)<br>(4/174)             | 0.56<br>(0.44 to 0.68)<br>(4/174)             | 0.29<br>(0.03 to 0.55)<br>(4/174)                   |

ALT: alanine aminotransferase, AST: aspartate aminotransferase, CI: confidence interval, n: number of adverse events (counted as maximum 1 per pregnancy), N: number of women for whom data was available, ROC AUC: receiver operating characteristic area under curve.

**Table 9. Sensitivity analysis of IPD associations between serum biochemistry and adverse perinatal outcomes for singleton pregnancies excluding unpublished studies**

| <b>Perinatal outcome</b>              | <b>Bile acids<br/>ROC AUC<br/>(95% CI)<br/>(N)</b> | <b>ALT<br/>ROC AUC<br/>(95% CI)<br/>(N)</b> | <b>AST<br/>ROC AUC<br/>(95% CI)<br/>(N)</b> | <b>Bilirubin<br/>ROC AUC<br/>(95% CI)<br/>(N)</b> |
|---------------------------------------|----------------------------------------------------|---------------------------------------------|---------------------------------------------|---------------------------------------------------|
| Stillbirth                            | 0.95<br>(0.93 to 0.97)<br>(5/1480)                 | 0.56<br>(0.26 to 0.86)<br>(5/1480)          | 0.57<br>(0.33 to 0.82)<br>(5/1480)          | 0.79<br>(0.62 to 0.95)<br>(5/1480)                |
| Preterm birth                         | 0.55<br>(0.52 to 0.58)<br>(532/1582)               | 0.53<br>(0.50 to 0.56)<br>(532/1582)        | 0.53<br>(0.50 to 0.56)<br>(532/1582)        | 0.57<br>(0.54 to 0.60)<br>(532/1582)              |
| Spontaneous preterm birth             | 0.61<br>(0.56 to 0.66)<br>(131/1549)               | 0.58<br>(0.52 to 0.63)<br>(131/1549)        | 0.58<br>(0.53 to 0.63)<br>(131/1549)        | 0.56<br>(0.51 to 0.62)<br>(131/1549)              |
| Iatrogenic preterm birth              | 0.53<br>(0.49 to 0.56)<br>(368/1549)               | 0.52<br>(0.48 to 0.55)<br>(368/1549)        | 0.51<br>(0.48 to 0.54)<br>(368/1549)        | 0.56<br>(0.53 to 0.59)<br>(368/1549)              |
| Meconium stained amniotic fluid       | 0.59<br>(0.55 to 0.63)<br>(220/1386)               | 0.59<br>(0.55 to 0.63)<br>(220/1386)        | 0.59<br>(0.55 to 0.63)<br>(220/1386)        | 0.57<br>(0.52 to 0.61)<br>(220/1386)              |
| Non-reassuring heart rate monitoring  | 0.63<br>(0.58 to 0.68)<br>(157/1164)               | 0.49<br>(0.44 to 0.54)<br>(157/1164)        | 0.54<br>(0.49 to 0.59)<br>(157/1164)        | 0.53<br>(0.48 to 0.58)<br>(157/1164)              |
| Apgar <7 at 5 minutes                 | 0.64<br>(0.53 to 0.74)<br>(30/1457)                | 0.47<br>(0.37 to 0.56)<br>(30/1457)         | 0.50<br>(0.41 to 0.60)<br>(30/1457)         | 0.53<br>(0.41 to 0.65)<br>(30/1457)               |
| Umbilical cord arterial blood pH <7.0 | 0.77<br>(0.57 to 0.98)<br>(3/426)                  | 0.41<br>(0.00 to 0.87)<br>(3/426)           | 0.45<br>(0.00 to 0.92)<br>(3/426)           | 0.71<br>(0.24 to 1.00)<br>(3/426)                 |
| Neonatal unit admission               | 0.59<br>(0.54 to 0.63)<br>(163/1297)               | 0.58<br>(0.53 to 0.62)<br>(163/1297)        | 0.58<br>(0.53 to 0.63)<br>(163/1297)        | 0.55<br>(0.50 to 0.60)<br>(163/1297)              |
| Neonatal death                        | 0.75<br>(0.42 to 1.00)<br>(4/1133)                 | 0.56<br>(0.22 to 0.90)<br>(4/1133)          | 0.59<br>(0.28 to 0.90)<br>(4/1133)          | 0.65<br>(0.47 to 0.82)<br>(4/1133)                |

ALT: alanine aminotransferase, AST: aspartate aminotransferase, CI: confidence interval, N: number of women for whom data was available, ROC AUC: receiver operating characteristic area under curve

**Table 10. National rates of stillbirth from 28 gestational weeks for studies included in the individual patient data analysis**

| Country of participants | Studies (by author and year)               | Number of patients | Recruitment years | National stillbirth rate 2000 (%) | National stillbirth rate 2015 (%) |
|-------------------------|--------------------------------------------|--------------------|-------------------|-----------------------------------|-----------------------------------|
| Argentina               | Castaño et al (2006) <sup>3</sup>          | 44                 | 2004-2005         | 0.73                              | 0.46                              |
|                         | Estiú et al (2017) <sup>29</sup>           | 400                | 2009-2013         |                                   |                                   |
| Australia               | Marathe et al (2017) <sup>37</sup>         | 344                | 2000-2010         | 0.34                              | 0.27                              |
| China                   | Chen et al (2013) <sup>28</sup>            | 38                 | 2007-2008         | 1.45                              | 0.72                              |
|                         | Cui et al (2018) <sup>4</sup>              | 42                 | 2012-2015         |                                   |                                   |
|                         | Shan et al (2016) <sup>20</sup>            | 362                | 2013-2015         |                                   |                                   |
| France                  | Bacq et al (2017) <sup>25</sup>            | 82                 | 1999-2013         | 0.55                              | 0.47                              |
| Israel                  | Raz et al (2015)                           | 78                 | 2008-2014         | 0.48                              | 0.42                              |
| Italy                   | Roncaglia et al (2002) <sup>18</sup>       | 207                | 1989-1997         | 0.40                              | 0.33                              |
| Lithuania               | Kondrackiene et al (2007) <sup>35</sup>    | 66                 | 1999-2002         | 0.58                              | 0.32                              |
| Netherlands             | Brouwers et al (2012) <sup>26</sup>        | 216                | 2005-2012         | 0.53                              | 0.18                              |
| Poland                  | Grymowicz et al (2016) <sup>10</sup>       | 157                | 2005-2006         | 0.47                              | 0.23                              |
|                         | Kowalska-Kańska et al (2013) <sup>14</sup> | 41                 | 2009-2011         |                                   |                                   |
| Sweden                  | Glantz et al (2007) <sup>30</sup>          | 40                 | 1999-2002         | 0.38                              | 0.28                              |
| Switzerland             | Furrer et al (2016) <sup>6</sup>           | 344                | 2004-2014         | 0.32                              | 0.28                              |
| Turkey                  | Günaydin et al (2017) <sup>31</sup>        | 38                 | 2015              | 1.27                              | 0.70                              |
|                         | Kebapcilar et al (2010) <sup>13</sup>      | 40                 | 2008-2009         |                                   |                                   |
|                         | Abide et al (2017)                         | 91                 | 2013-2016         |                                   |                                   |
| UK                      | Chappell et al (2012) <sup>27</sup>        | 128                | 2008-2011         | 0.37                              | 0.29                              |
|                         | Geenes et al (2014) <sup>8</sup>           | 708                | 2010-2011         |                                   |                                   |
|                         | Kenyon et al (2002) <sup>33</sup>          | 73                 | 1999-2001         |                                   |                                   |
|                         | unpublished Imperial and GSTT data         | 313                | 2006-2017         |                                   |                                   |
| USA                     |                                            | 109                | 2006-2017         | 0.31                              | 0.30                              |
|                         | Kawakita et al (2015) <sup>32</sup>        | 233                | 2009-2014         |                                   |                                   |
|                         | Kohari et al (2017) <sup>34</sup>          | 857                | 2005-2013         |                                   |                                   |
|                         | Lee et al (2008) <sup>36</sup>             | 117                | 2000-2007         |                                   |                                   |
|                         | Rook et al (2012) <sup>38</sup>            | 101                | 2005-2009         |                                   |                                   |

National stillbirth rates from Blencowe *et al*, reporting stillbirths from 28 gestational weeks.<sup>55</sup> Comparative analyses from our data were thus limited to the equivalent gestational period.

Figure 1. Forest plots of selected perinatal outcomes from aggregated patient data

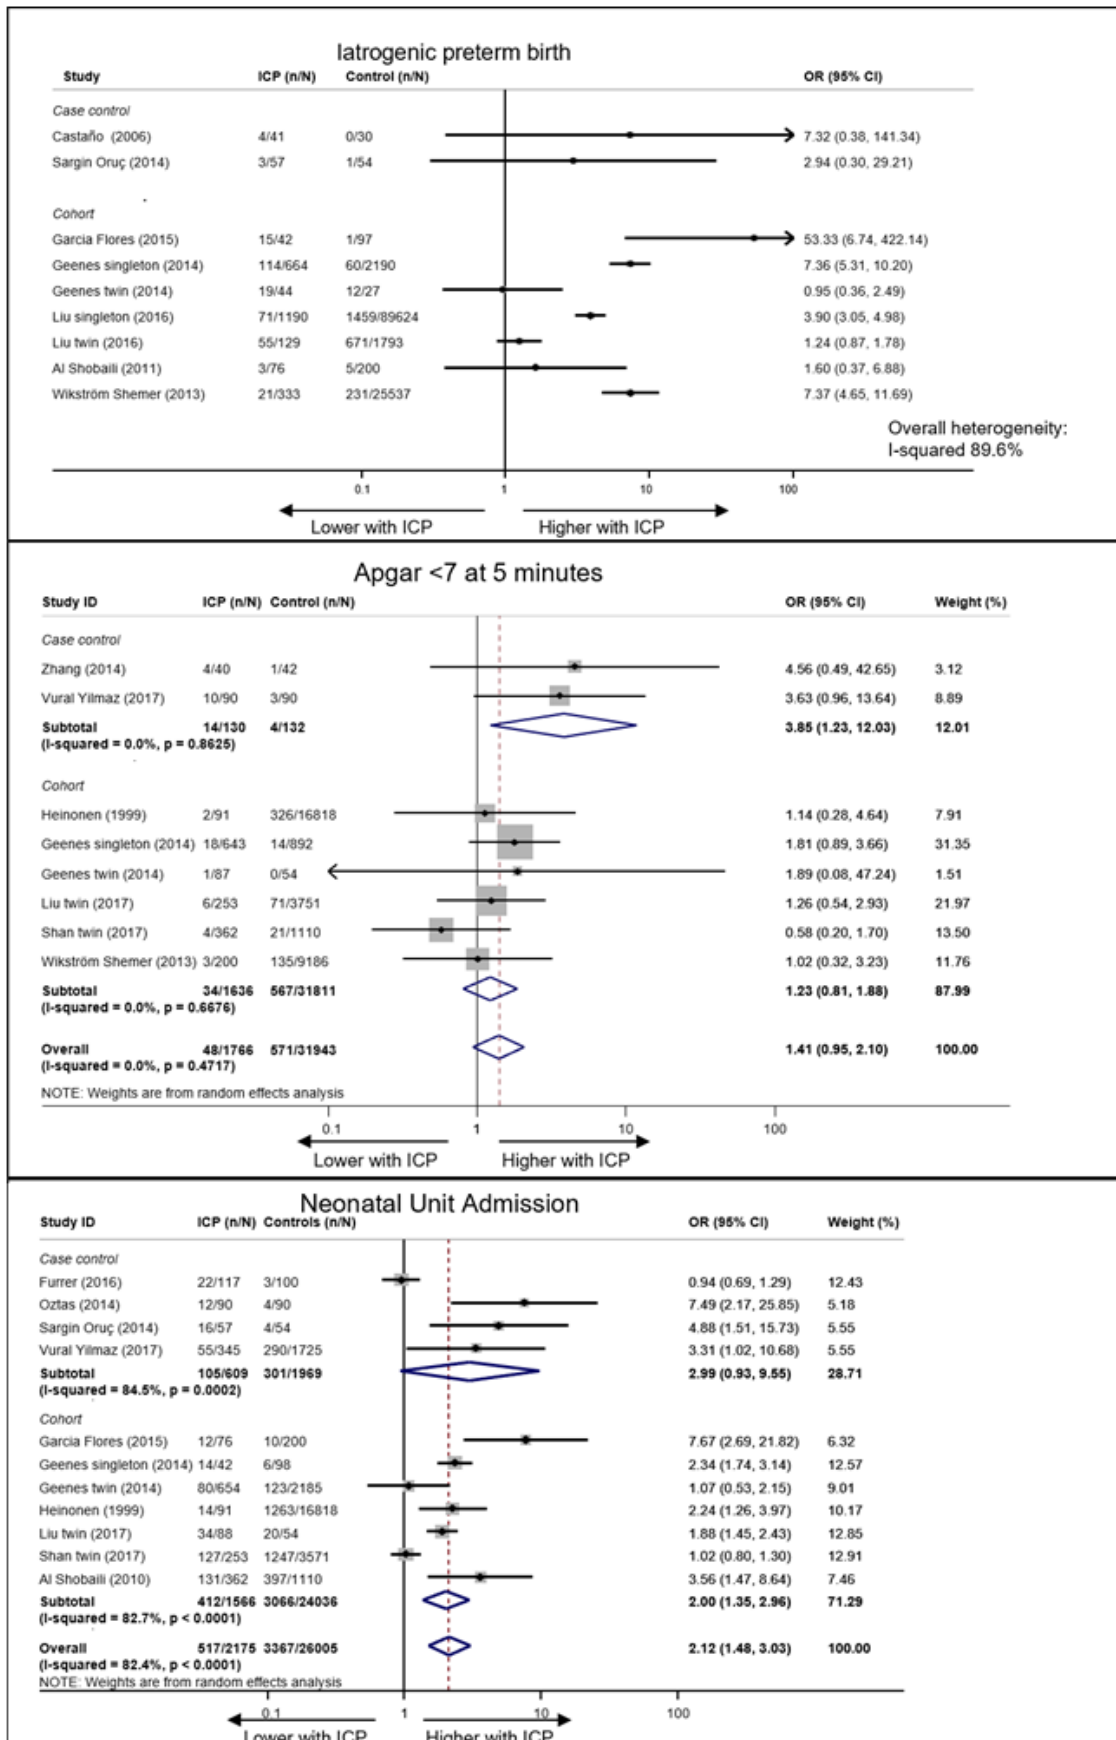

**Figure 2. Correction for publication bias in meta-analysis of neonatal unit admission rates in intrahepatic cholestasis of pregnancy**

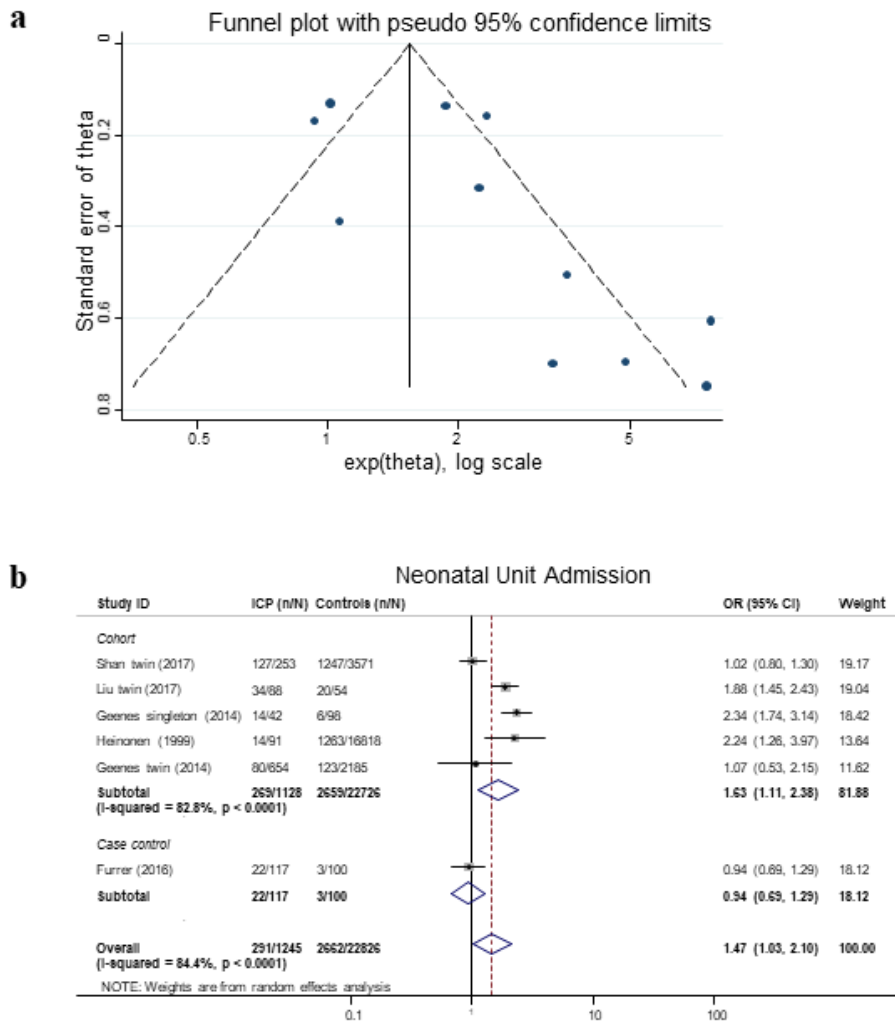

a) Funnel plot of publications included in aggregate data meta-analysis of the association between intrahepatic cholestasis of pregnancy (ICP) and control pregnancies, demonstrating 5 studies likely responsible for the bias in the bottom right of the plot (standard error of theta < 0.5)

b) Forest plot of random effects meta-analysis of the effect of ICP on neonatal unit admission excluding the 5 studies demonstrated in (a) as likely to contribute to publication bias

**Figure 3. Receiver operating curves for association between stillbirth and serum biochemical markers for multifetal pregnancies**

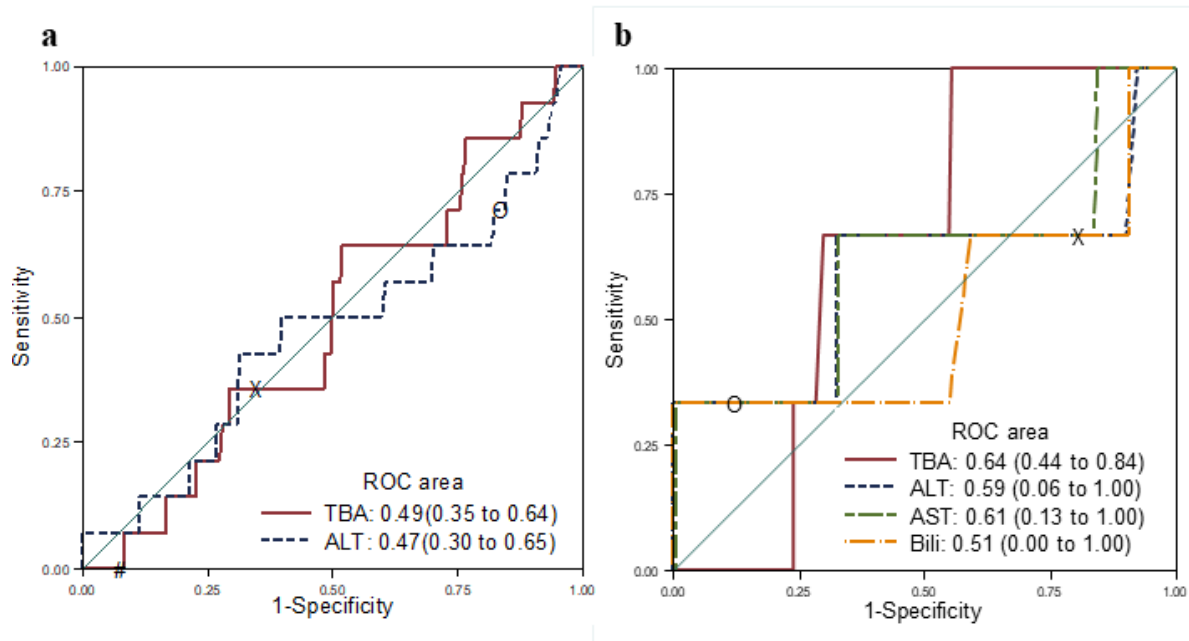

- a) Association between stillbirth and peak TBA and ALT concentrations for multifetal pregnancies in a subset of women with both biochemical tests. x: TBA 40 $\mu$ mol/L, #: TBA 100 $\mu$ mol/L, o: ALT 40IU/L, n=641
- b) Association between stillbirth and peak TBA, ALT, AST and Bilirubin concentrations for multifetal pregnancies in a subset of women with both biochemical tests. x: AST 40IU/L, o: Bilirubin 20 $\mu$ mol/L, n=207

Results are shown for women with results available for all biochemical tests presented in each graph, with ROC area and 95% confidence interval reported for each test. ROC: receiver operating curve.

**Figure 4. Receiver operating characteristic curve for the association between total bile acid concentrations and stillbirth for women treated and untreated with ursodeoxycholic acid**

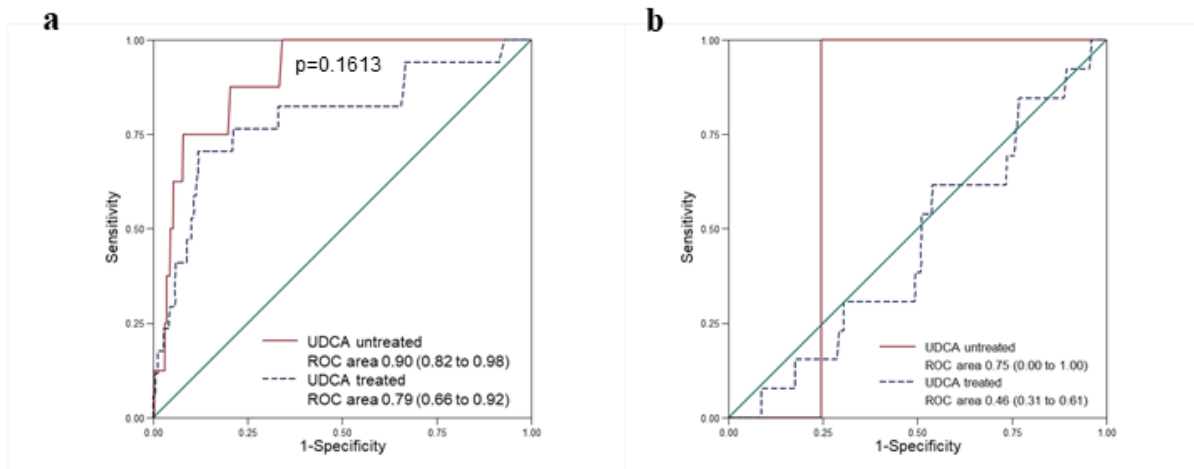

Results show ROC area under curve (95% confidence interval). Comparison between ROC areas shown by p value, determined with Chi-squared test. Statistical comparison not performed for multifetal pregnancies, as only one stillbirth happened in the untreated group. UDCA: ursodeoxycholic acid; ROC: receiver operating characteristic

- (a) Singleton pregnancies
- (b) Multifetal pregnancies

**Figure 5. Proportion and incidence of stillbirths and total number of pregnancies by total bile acid concentrations in multifetal pregnancies with intrahepatic cholestasis of pregnancy**

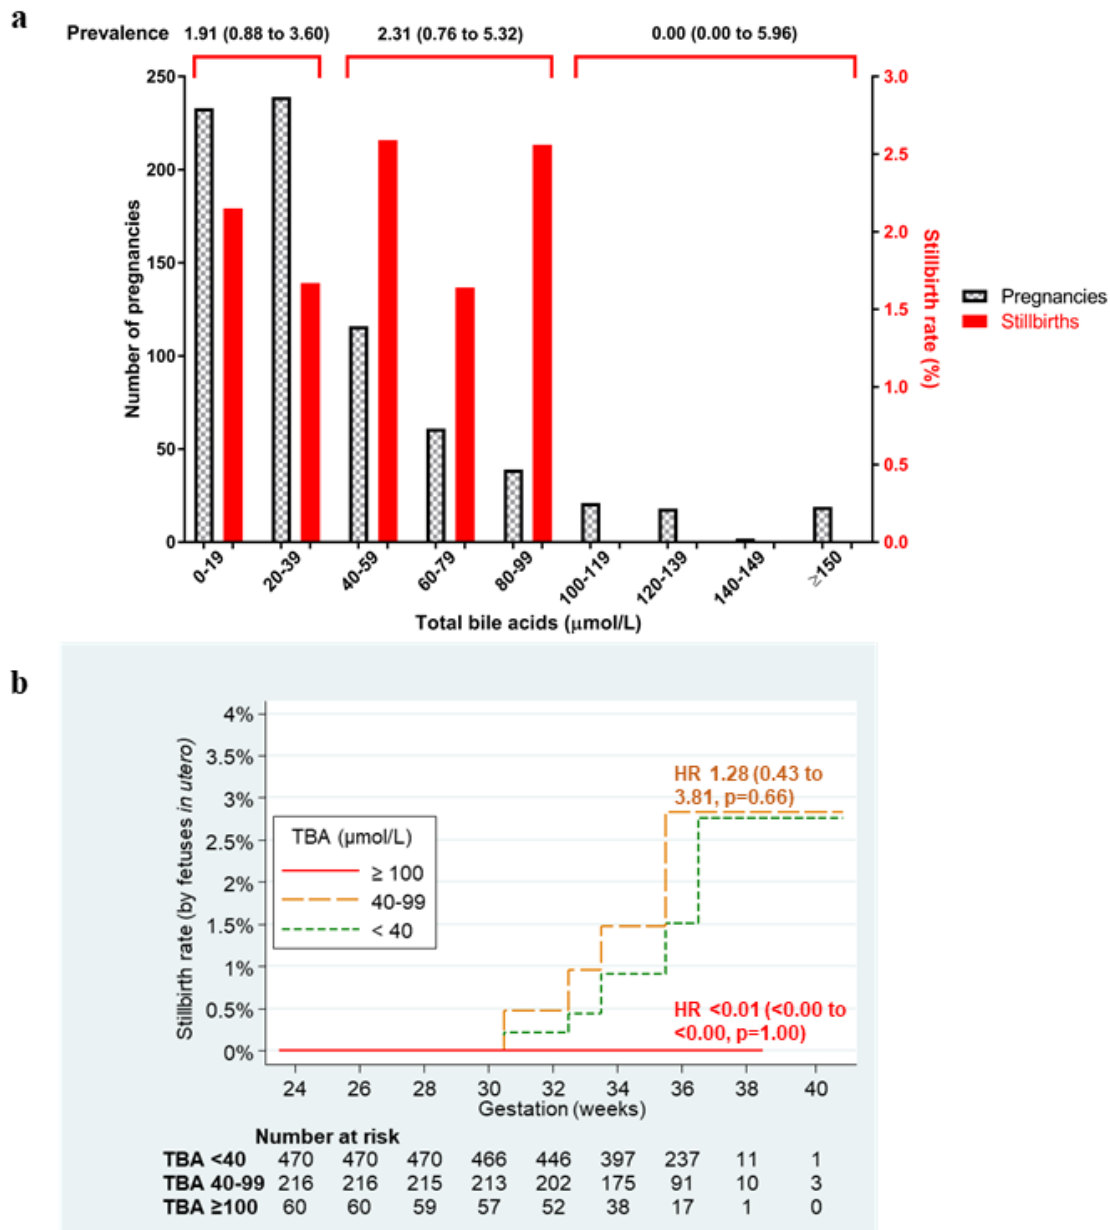

a) Number of women with ICP (black bars) and proportion of stillbirth (red bars) by peak total bile acid category. Stillbirth incidence by total bile acid groups  $<40\mu\text{mol/L}$ ,  $40-99\mu\text{mol/L}$  and  $\geq 100\mu\text{mol/L}$  (95% confidence interval)

b) Stillbirth rate by number of fetuses *in utero* until 40 gestational weeks. Data are analysed by completed gestational week categories, with alterations plotted mid-week to reflect uncertainty by individual day of change. Data are not shown from 40 weeks due to the low remaining numbers of fetuses *in utero*. HR: hazard ratio, showing HR of stillbirth compared with women with bile acids  $<40\mu\text{mol/L}$  (95% confidence interval)



Figure 6. Stillbirth rate by number of fetuses *in utero* for singleton pregnancies

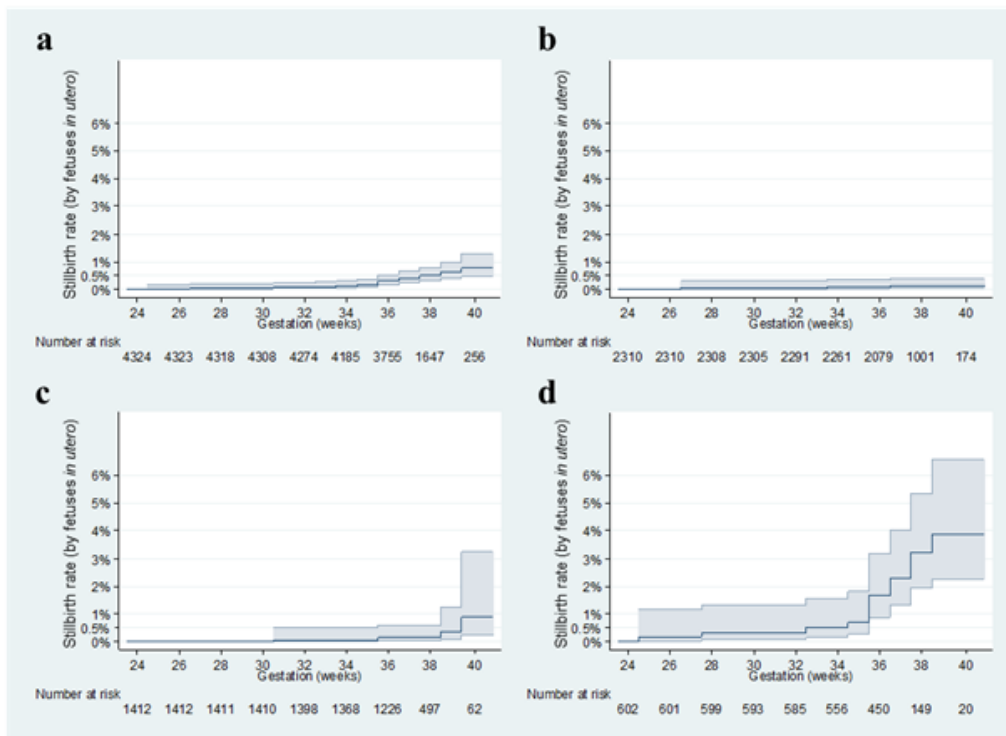

Grey shaded area indicates 95% confidence interval

- (a) All participants
- (b) Women with total bile acids <40 μmol/L
- (c) Women with total bile acids 40-99 μmol/L
- (d) Women with total bile acids ≥100 μmol/L

Figure 7. Sensitivity analysis of stillbirth rate by number of fetuses *in utero* for singleton pregnancies

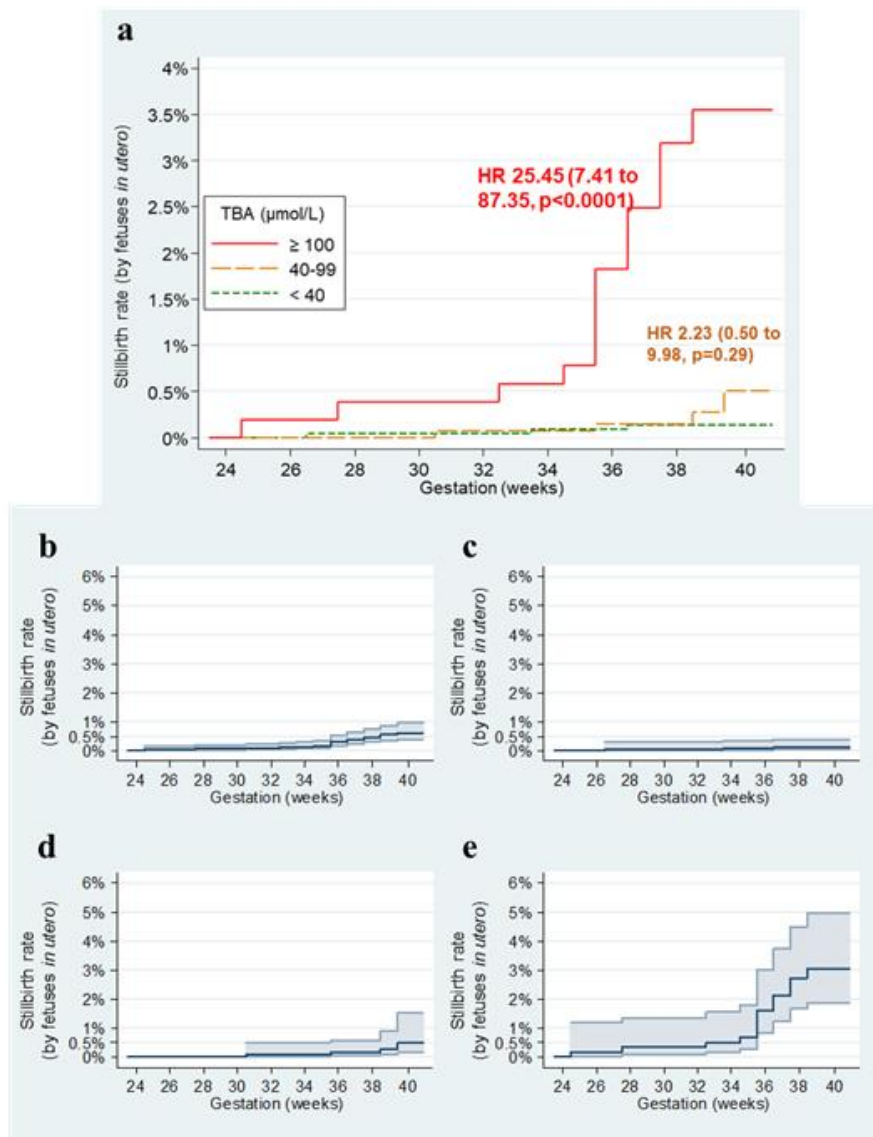

Analysis performed on the assumption that all iatrogenic deliveries would not have been followed by stillbirth before 40 gestational weeks. Results are presented for singleton pregnancies

(a) Stillbirth rate by number of fetuses *in utero* until 40 gestational weeks. Data are analysed by completed gestational week categories, with alterations plotted mid-week to reflect uncertainty by individual day of change. Data are not shown from 40 weeks due to the low remaining numbers of fetuses *in utero*. HR: hazard ratio, showing HR of stillbirth compared with women with bile acids  $< 40 \mu\text{mol/L}$  (95% confidence interval). HR for women with bile acids  $\geq 100 \mu\text{mol/L}$  compared with bile acids 40-99: 5.17 (2.29 to 11.70,  $p < 0.0001$ )

(b) All participants

(c) Women with total bile acids  $< 40 \mu\text{mol/L}$

(d) Women with total bile acids 40-99  $\mu\text{mol/L}$

(e) Women with total bile acids  $\geq 100 \mu\text{mol/L}$

Grey shaded areas indicate 95% confidence intervals

Figure 8. Spontaneous preterm birth rate by number of fetuses *in utero* for singleton pregnancies

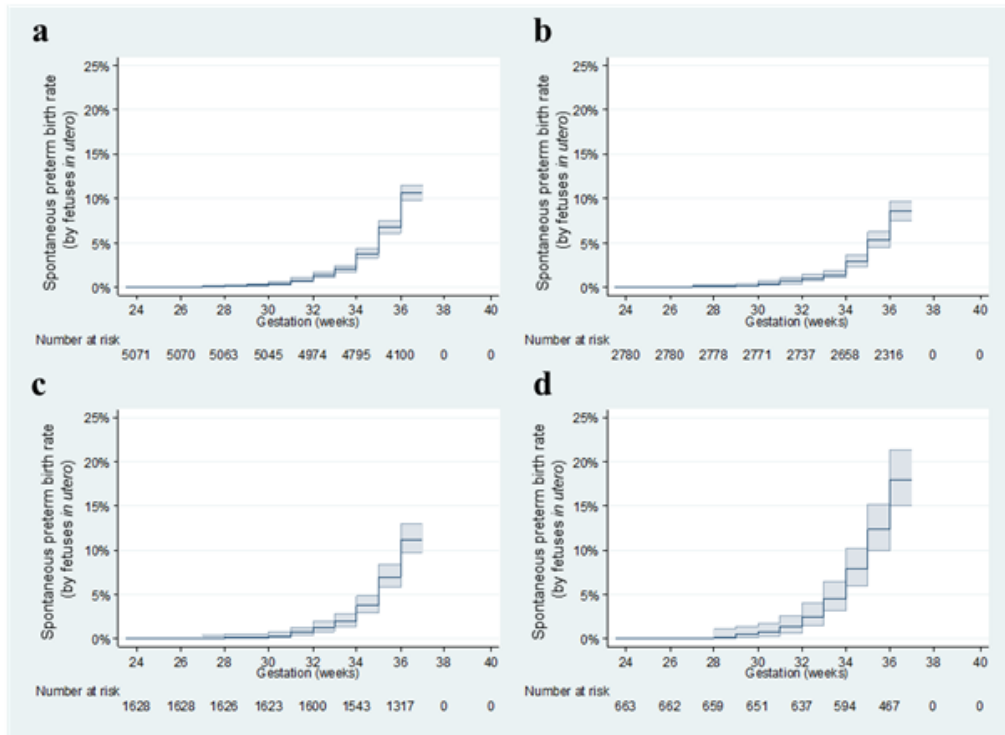

Grey shaded area indicates 95% confidence interval

- (a) All participants
- (b) Women with total bile acids <40 $\mu$ mol/L
- (c) Women with total bile acids 40-99 $\mu$ mol/L
- (d) Women with total bile acids  $\geq$ 100 $\mu$ mol/L

**Figure 9. Proportion and incidence of preterm births and total number of pregnancies by total bile acid concentrations in multifetal pregnancies with intrahepatic cholestasis of pregnancy**

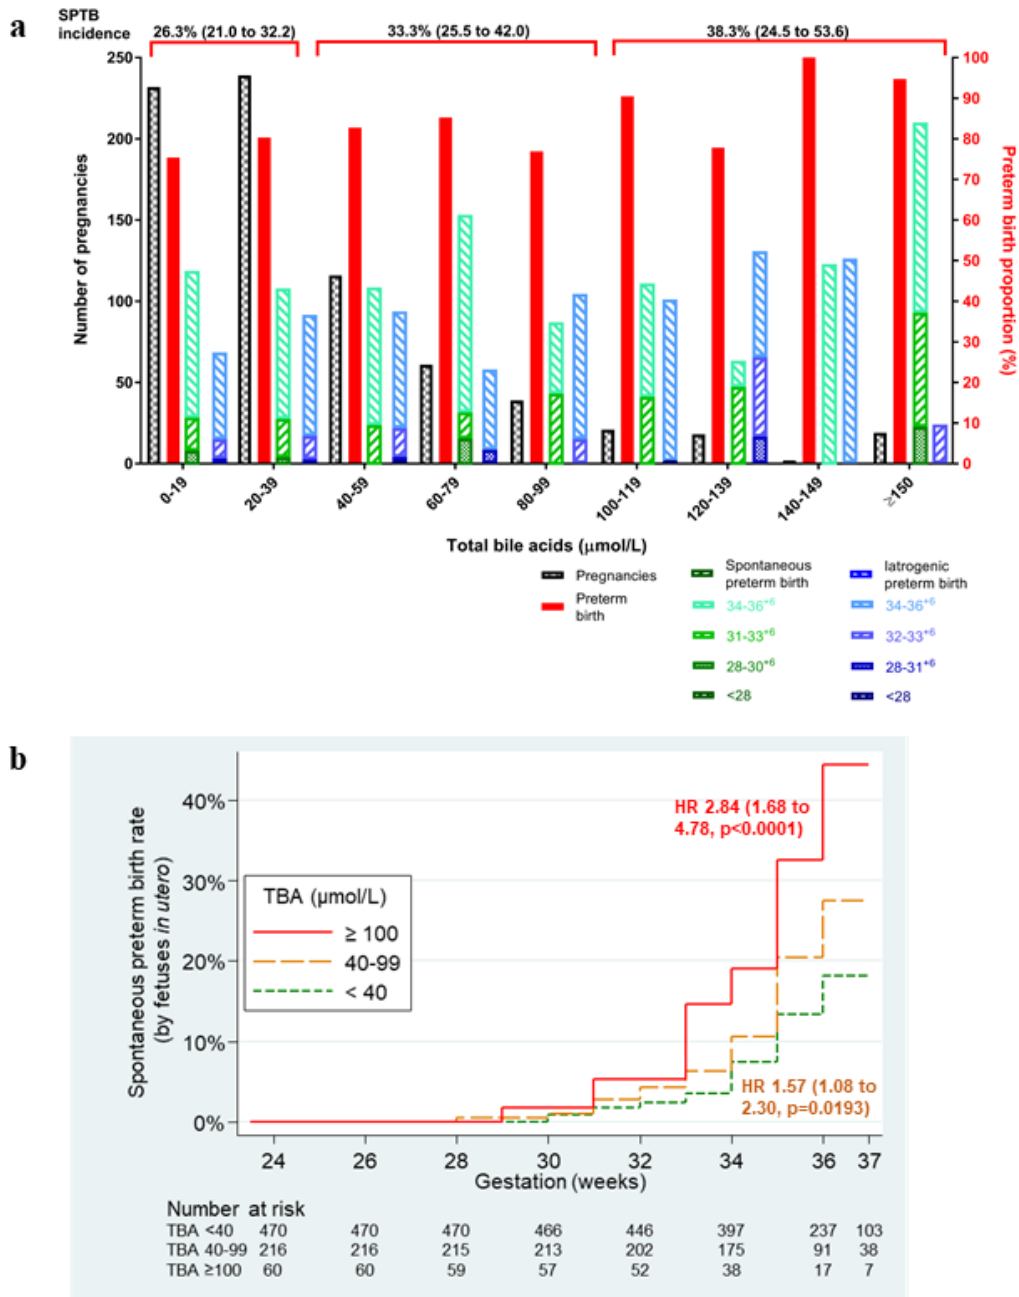

a) Number of women with ICP (black bars) and preterm birth proportion (red bars) by peak total bile acid category. Spontaneous preterm birth proportion: green bars. Iatrogenic preterm birth proportion: blue bars. Spontaneous preterm birth (SPTB) incidence by total bile acid groups <40μmol/L, 40-99μmol/L and ≥100μmol/L (95% confidence interval)

b) Spontaneous preterm birth rate by number of fetuses *in utero* until 37 gestational weeks. Data are analysed by completed gestational week categories, with alterations plotted mid-week to reflect uncertainty by individual day of change. HR: hazard ratio, showing HR of spontaneous preterm birth rate compared with women with bile acids <40μmol/L (95% confidence interval)

## References

- 1 Al Shobaili HA, Hamed HO, Al Robaee A, Alzolibani AA, Amin AF, Ahmad SR. Obstetrical and fetal outcomes of a new management strategy in patients with intra-hepatic cholestasis of pregnancy. *Arch Gynecol Obstet*. 2011; **283**: 1219–1225.
- 2 Ataalla WM, Ziada DH, Gaber R, Ossman A, Bayomy S, Elemery BR. The impact of total bile acid levels on fetal cardiac function in intrahepatic cholestasis of pregnancy using fetal echocardiography: a tissue Doppler imaging study. *J Matern Fetal Neonatal Med*. 2016; **29**: 1445–1450.
- 3 Castaño G, Lucangioli S, Sookoian S, et al. Bile acid profiles by capillary electrophoresis in intrahepatic cholestasis of pregnancy. *Clin Sci*. 2006; **110**: 459–465.
- 4 Cui Y, Xu B, Zhang X, He Y, Shao Y, Ding M. Diagnostic and therapeutic profiles of serum bile acids in women with intrahepatic cholestasis of pregnancy—a pseudo-targeted metabolomics study. *Clin Chim Acta*. 2018; **483**: 135–141.
- 5 RCOG Green Top Guideline No. 43. Obstetric Cholestasis. 2011 [cited 2018 Mar 17]. Available from: [https://www.rcog.org.uk/globalassets/documents/guidelines/gtg\\_43.pdf](https://www.rcog.org.uk/globalassets/documents/guidelines/gtg_43.pdf)
- 6 Furrer R, Winter K, Schäffer L, Zimmermann R, Burkhardt T, Haslinger C. Postpartum blood loss in women treated for intrahepatic cholestasis of pregnancy. *Obstet Gynecol*. 2016; **128**: 1048–1052.
- 7 Garcia-Flores J, Cañamares M, Cruceyra M, et al. Clinical value of maternal bile acid quantification in intrahepatic cholestasis of pregnancy as an adverse perinatal outcome predictor. *Gynecol Obstet Invest*. 2015; **79**: 222–228.
- 8 Geenes V, Chappell LC, Seed PT, Steer PJ, Knight M, Williamson C. Association of severe intrahepatic cholestasis of pregnancy with adverse pregnancy outcomes: A prospective population-based case-control study. *Hepatology*. 2014; **59**: 1482–1491.
- 9 Glantz A, Marschall HU, Mattsson LÅ. Intrahepatic cholestasis of pregnancy: Relationships between bile acid levels and fetal complication rates. *Hepatology*. 2004; **40**: 467–474.
- 10 Grymowicz M, Czajkowski K, Smolarczyk R. Pregnancy course in patients with intrahepatic cholestasis of pregnancy treated with very low doses of ursodeoxycholic acid. *Scand J Gastroenterol*. 2016; **51**: 78–85.
- 11 Heinonen S, Kirkinen P. Pregnancy outcome with intrahepatic cholestasis. *Obstet Gynecol*. 1999; **94**: 189–193.
- 12 Herrera CA, Manuck TA, Stoddard GJ, et al. Perinatal outcomes associated with intrahepatic cholestasis of pregnancy. *J Matern Fetal Neonatal Med*. 2018; **31**: 1913–20.
- 13 Kebapcilar AG, Taner CE, Kebapcilar L, Bozkaya G. High mean platelet volume, low-grade systemic coagulation, and fibrinolytic activation are associated with pre-term delivery and low APGAR score in intrahepatic cholestasis of pregnancy. *J Matern Fetal Neonatal Med*. 2010; **23**: 1205–1210.
- 14 Kowalska-Kańska A, Maciejewski T, Niemiec KT. The concentrations of bile acids and erythropoietin in pregnant women with intrahepatic cholestasis and the state of the fetus and newborn. *Med Wieku Rozwoj*. 2013; **17**: 232–245.
- 15 Liu X, Landon MB, Chen Y, Cheng W. Perinatal outcomes with intrahepatic cholestasis of pregnancy in twin pregnancies. *J Matern Fetal Neonatal Med*. 2016; **29**: 2176–2181.

- 16 Oztas E, Erkenekli K, Ozler S, et al. Can routine laboratory parameters predict adverse pregnancy outcomes in intrahepatic cholestasis of pregnancy? *J Perinat Med*. 2015; **43**: 667–674.
- 17 Raz Y, Lavie A, Vered Y, et al. Severe intrahepatic cholestasis of pregnancy is a risk factor for preeclampsia in singleton and twin pregnancies. *Am J Obstet Gynecol*. 2015; **213**: 395.e1-e8.
- 18 Roncaglia N, Arreghini A, Locatelli A, Bellini P, Andreotti C, Ghidini A. Obstetric cholestasis: outcome with active management. *Eur J Obstet Gynecol Reprod Biol*. 2002; **100**: 167–170.
- 19 Sargin Oruç A, Seçkin B, Özcan N, Özyer S, Uzunlar Ö, Danişman N. Role of postprandial bile acids in prediction of perinatal outcome in intrahepatic cholestasis of pregnancy. *J Obstet Gynaecol Res*. 2014; **40**: 1883–1889.
- 20 Shan D, Hu Y, Qiu P, et al. Intrahepatic cholestasis of pregnancy in women with twin pregnancy. *Twin Res Hum Genet*. 2016; **19**: 697–707.
- 21 Vural Yılmaz Z, Gencosmanoglu Turkmen G, Daglar K, Yılmaz E, Kara O, Uygur D. Elevated red blood cell distribution width is associated with intrahepatic cholestasis of pregnancy. *Ginekol Pol*. 2017; **88**: 75–80.
- 22 Wikström Shemer EA, Thorsell M, Marschall HU, Kaijser M. Risks of emergency cesarean section and fetal asphyxia after induction of labor in intrahepatic cholestasis of pregnancy: A hospital-based retrospective cohort study. *Sex Reprod Healthc*. 2013; **4**: 17–22.
- 23 Wong LFA, Shallow H, O’Connell MP. Comparative study on the outcome of obstetric cholestasis. *J Matern Fetal Neonatal Med*. 2008; **21**: 327–330.
- 24 Zhang Y, Hu L, Cui Y, et al. Roles of PPAR $\gamma$ /NF- $\kappa$ B signaling pathway in the pathogenesis of intrahepatic cholestasis of pregnancy. *PLoS One*. 2014; **9**: 1–11.
- 25 Bacq Y, le Besco M, Lecuyer AI, et al. Ursodeoxycholic acid therapy in intrahepatic cholestasis of pregnancy: Results in real-world conditions and factors predictive of response to treatment. *Dig Liver Dis*. 2017; **49**: 63–69.
- 26 Brouwers L, Koster MPH, Page-Christiaens GCML, et al. Intrahepatic cholestasis of pregnancy: Maternal and fetal outcomes associated with elevated bile acid levels. *Am J Obstet Gynecol*. 2015; **212**: 100e1–e7.
- 27 Chappell LC, Gurung V, Seed PT, Chambers J, Williamson C, Thornton JG. Ursodeoxycholic acid versus placebo, and early term delivery versus expectant management, in women with intrahepatic cholestasis of pregnancy: semifactorial randomised clinical trial. *BMJ*. 2012; **344**: e3799.
- 28 Chen J, Deng W, Wang J, Shao Y, Ou M, Ding M. Primary bile acids as potential biomarkers for the clinical grading of intrahepatic cholestasis of pregnancy. *Int J Gynecol Obstet*. 2013; **122**: 5–8.
- 29 Estiú MC, Frailuna MA, Otero C, et al. Relationship between early onset severe intrahepatic cholestasis of pregnancy and higher risk of meconium-stained fluid. *PLoS One*. 2017; **12**: e0176504.
- 30 Glantz A, Reilly SJ, Benthin L, Lammert F, Mattsson LÅ, Marschall HU. Intrahepatic cholestasis of pregnancy: Amelioration of pruritus by UDCA is associated with decreased progesterone disulphates in urine. *Hepatology*. 2007; **47**: 544–551.
- 31 Gunaydin B, Bayram M, Altug M, Cevher S, Bozkurt N. Retrospective analysis of maternal,

- fetal, and neonatal outcomes of intrahepatic cholestasis of pregnancy at Gazi University. *Turkish J Med Sci.* 2017; **47**: 583–586.
- 32 Kawakita T, Parikh LI, Ramsey PS, et al. Predictors of adverse neonatal outcomes in intrahepatic cholestasis of pregnancy. *Am J Obstet Gynecol.* 2015; **213**: 570.e1–e8.
- 33 Kenyon AP, Piercy CN, Girling J, Williamson C, Tribe RM, Shennan AH. Obstetric cholestasis, outcome with active management: a series of 70 cases. *BJOG.* 2002; **109**: 282–288.
- 34 Kohari K, Ferrara L, Carroll R, Capogna S, Ditchik A, Fox N. Outcome after implementation of a new management strategy for intrahepatic cholestasis of pregnancy. *Am J Obstet Gynecol.* 2015; **212**: S395.
- 35 Kondrackiene J, Beuers U, Zalinkevicius R, Tauschel HD, Gintautas V, Kupcinskas L. Predictors of premature delivery in patients with intrahepatic cholestasis of pregnancy. *World J Gastroenterol.* 2007; **13**: 6226–6230.
- 36 Lee RH, Kwok KM, Ingles S, et al. Pregnancy outcomes during an era of aggressive management for intrahepatic cholestasis of pregnancy. *Am J Perinatol.* 2008; **25**: 341–345.
- 37 Marathe JA, Lim WH, Metz MP, Scheil W, Dekker GA, Hague WM. A retrospective cohort review of intrahepatic cholestasis of pregnancy in a South Australian population. *Eur J Obstet Gynecol Reprod Biol.* 2017; **218**: 33–38.
- 38 Rook M, Vargas J, Caughey A, Bacchetti P, Rosenthal P, Bull L. Fetal outcomes in pregnancies complicated by intrahepatic cholestasis of pregnancy in a Northern California cohort. *PLoS One.* 2012; **7**: 3–8.
- 39 Yayla Abide Ç, Vural F, Kılıççı Ç, et al. Can we predict severity of intrahepatic cholestasis of pregnancy using inflammatory markers? *Turkish J Obstet Gynecol.* 2017; **14**: 160–165.
- 40 Binder T, Salaj P, Zima T, Vitek L. Randomized prospective comparative study of ursodeoxycholic acid and S-adenosyl-L-methionine in the treatment of intrahepatic cholestasis of pregnancy. *J Perinat Med.* 2006; **34**: 383–391.
- 41 Bolukbas FF, Bolukbas C, Y Balaban H, et al. Intrahepatic cholestasis of pregnancy: spontaneous vs in vitro fertilization. *Euroasian J Hepatogastroenterology.* 2017; **7**: 126–129.
- 42 Chen H, Zhou Y, Deng D, Hao H, Dang J, Li J. Intrahepatic cholestasis of pregnancy: Biochemical predictors of adverse perinatal outcomes. *J Huazhong Univ Sci Technol Medical Sci.* 2013; **33**: 412–417.
- 43 Erkenekli K, İskender CT, Onur Topçu H, Ensari T, Uygur D, Danişman N. Are postprandial bile acid levels helpful in predicting perinatal complications in patients with intrahepatic cholestasis of pregnancy? *Cukurova Med J.* 2015; **40**: 212–220.
- 44 Friberg AK, Zingmark V, Lyndrup J. Early induction of labor in high-risk intrahepatic cholestasis of pregnancy: what are the costs? *Arch Gynecol Obstet.* 2016; **294**: 709–714.
- 45 Jin J, Pan S, Huang L, Yu Y, Zhong M, Zhang G. Risk factors for adverse fetal outcomes among women with early- versus late-onset intrahepatic cholestasis of pregnancy. *Int J Gynecol Obstet.* 2015; **128**: 236–240.
- 46 Joutsiniemi T, Timonen S, Linden M, Suvitie P, Ekblad U. Intrahepatic cholestasis of pregnancy: observational study of the treatment with low-dose ursodeoxycholic acid. *BMC Gastroenterol.* 2015; **15**: 92.

- 47 Labbe C, Delesalle C, Creveuil C, Dreyfus M. Cholestases intrahepatiques gravidiques (CIG) précoces et tardives : étude des complications materno-fœtales. *Gynécologie Obs Fertil Sénologie*. 2018; **46**: 388–394.
- 48 Lin J, Gu W, Hou Y. Diagnosis and prognosis of early-onset intrahepatic cholestasis of pregnancy: a prospective study. *J Matern Fetal Neonatal Med*. 2017; 1–7. doi: 10.1080/14767058.2017.1397124
- 49 Madazli R, Yuksel MA, Oncul M, Tuten A, Guralp O, Aydin B. Pregnancy outcomes and prognostic factors in patients with intrahepatic cholestasis of pregnancy. *J Obstet Gynaecol*. 2015; **35**: 358–361.
- 50 Oztekin D, Aydal I, Oztekin O, Okcu S, Borekci R, Tinar S. Predicting fetal asphyxia in intrahepatic cholestasis of pregnancy. *Arch Gynecol Obstet*. 2009; **280**: 975–979.
- 51 Pata O, Vardareli E, Ozcan A, et al. Intrahepatic cholestasis of pregnancy: correlation of preterm delivery with bile acids. *Turkish J Gastroenterol*. 2011; **22**: 602–605.
- 52 Riikonen S, Savonius H, Gylling H, Nikkilä K, Tuomi AM, Miettinen TA. Oral guar gum, a gel-forming dietary fiber relieves pruritus in intrahepatic cholestasis of pregnancy. *Acta Obstet Gynecol Scand*. 2000; **79**: 260–264.
- 53 Zecca E, De Luca D, Barbato G, Marras M, Tiberi E, Romagnoli C. Predicting respiratory distress syndrome in neonates from mothers with intrahepatic cholestasis of pregnancy. *Early Hum Dev*. 2008; **84**: 337–341.
- 54 Zhang L, Liu X-H, Qi H-B, et al. Ursodeoxycholic acid and S-adenosylmethionine in the treatment of intrahepatic cholestasis of pregnancy: a multi-centered randomized controlled trial. *Eur Rev Med Pharmacol Sci*. 2015; **19**: 3770–3776.
- 55 Blencowe H, Cousens S, Jassir FB, et al. National, regional, and worldwide estimates of stillbirth rates in 2015, with trends from 2000: a systematic analysis. *Lancet Glob Heal*. 2016; **4**: e98–108.
